# Supplementary material for: Extending the scope of oleic acid catalysis in diversity-oriented synthesis of chromene and pyrimidine based scaffolds
Source: Royal Society of Chemistry journal article supplement (doi:10.1039/c6ra02507b), 2016-01-01
Supplement: c6ra02507b1.pdf [file c6ra02507b1.pdf]

## Extending the scope of oleic acid catalysis in diversity-oriented synthesis of chromene and pyrimidine based scaffolds

Asaithampi Ganesan, Jagatheeswaran Kothandapani, Subramaniapillai Selva Ganesan\*

Department of Chemistry,

School of Chemical and Biotechnology,

SASTRA University, Thanjavur-613401, Tamil Nadu, India

Fax: +91 (4362) 264120;

E-mail: [selva@biotech.sastra.edu](mailto:selva@biotech.sastra.edu)

### Table of Contents:

|                                                                                    |       |
|------------------------------------------------------------------------------------|-------|
| Materials and methods and spectral data                                            | 2-8   |
| References and microscopic images                                                  | 9     |
| <sup>1</sup> H NMR spectra of 4 <i>H</i> -chromene derivatives (3a-3n)             | 10-23 |
| <sup>1</sup> H NMR spectra of knoevenagel by product (6)                           | 24    |
| <sup>1</sup> H NMR spectra of pyrimidine-fused heterocycles (7a-7c)                | 25-27 |
| <sup>1</sup> H NMR spectra of pyrimidine-fused heterocycles (8)                    | 28    |
| <sup>1</sup> H NMR spectra of pyrimidine-fused heterocycles (10a-10f)              | 29-34 |
| <sup>1</sup> H NMR spectra of curcumin-based pyrano[2,3- <i>d</i> ]pyrimidine (11) | 35    |

## Supporting information

### Materials and methods

All the chemicals were received from sigma Aldrich, Loba chemicals, Merck, Avra synthesis or SD Fine chemicals. The Oleic acid was obtained from (Pdt No: 61821625001730) Merck chemicals, and its used as such any further purification The 2-hydroxychalcone were synthesized through reported Literature. Melting points were found *via* microscopic melting point apparatus and those were uncorrected. Subsequently the characterization of NMR ( $H^1$ ) were determined by a Bruker Av-300MHz spectrometer TMS as internal standard and  $CDCl_3$ , DMSO- $d_6$  as external solvent. Labomed LX- 400 Microscope were used for images. All the reactions were carried out to the 10 ML round bottom flask with magnetic stirrer.

### General procedure for synthesis of 4H-chromene derivatives synthesis (3a-g)

The 2-hydroxychalcone (1.0 mmol) and indole (1mmol, 117 mg) were added to the mixture of oleic acid (40  $\mu$ L) in water at room temperature. Then the reaction mixture was refluxed 4 hours. The progress of the reaction was monitored by TLC. After completion of reaction, the reaction mixture was cooled to room temperature. Then the reaction mixture was extracted with ethyl acetate ( $2 \times 20$  mL) and the combined extracts were washed with water ( $1 \times 10$  mL) and dried over anhydrous sodium sulphate. The solvents were removed under reduced pressure and the crude residue was purified through the silica gel column chromatography (eluent ethyl acetate, hexane solvent mixture). Eventually pale red solid was obtained with good yield.

#### ***3-(2-phenyl-4H-chromen-4yl)-1H-indole (3a)***

Yield = 228 mg (71 %) Brown solid. Mp 99-101 $^{\circ}$ C (Lit 100-102  $^{\circ}$ C)<sup>1</sup>.  $H^1$  NMR (300 MHz,  $CDCl_3$ ,  $\delta$  ppm): 5.17 (d,  $J = 3.9$  Hz, 1H), 5.68 (d,  $J = 4.2$  Hz, 1H), 6.92 (td,  $J = 7.8, 1.8$  Hz, 1H), 7.02-7.19 (m, 6H), 7.31-7.39 (m, 4H), 7.62 (d,  $J = 7.8$  Hz, 1H), 7.72 (d,  $J = 7.2$  Hz, 2H), 7.99(brs, 1H).

#### ***2-methyl-3-(2-phenyl-4H-chromen-4yl)-1H-indole (3b)***

Yield = 217 mg (67 %) Brown solid, Mp 97-99 $^{\circ}$ C (Lit 97-98 $^{\circ}$ C)<sup>1</sup>.  $H^1$  NMR (300 MHz,  $CDCl_3$ ,  $\delta$  ppm): 2.39 (s, 3H), 5.19 (d,  $J = 3.6$  Hz, 1H), 5.57 (d,  $J = 3.6$  Hz, 1H), 6.86-6.98 (m, 3H), 7.04-7.15 (m, 3H), 7.27-7.40 (m, 4H), 7.45 (d,  $J = 7.8$  Hz, 1H), 7.72 (dd,  $J = 7.8, 1.2$  Hz, 2H), 7.78(brs, 1H)

***5-methoxy-3-(2-phenyl-4H-chromen-4yl)-1H-indole (3c)***

Yield = 220mg mg (68 %) Gum-like red (lit)<sup>1</sup> oil., H<sup>1</sup> NMR (300 MHz, CDCl<sub>3</sub>, δ ppm): 3.74 (s, 3H), 5.13 (d, *J* = 3.9 Hz, 1H), 5.67 (d, *J* = 3.7 Hz, 1H), 6.82 (dd, *J* = 8.7, 2.4 Hz, 1H), 6.93 (td, *J* = 7.8, 1.8 Hz, 1H), 7.06 (t, *J* = 2.7 Hz, 2H), 7.11-7.23 (m, 3H), 7.31-7.47 (m, 3H), 7.72 (dd, *J* = 7.8, 1.2 Hz, 2H), 7.91 (brs, 1H).

***3-[2-(2-bromophenyl)-4H-chromen-4-yl]-1H-indole (3d)***

Yield = 242 mg (60 %) Gum-like red (lit)<sup>1</sup>. H<sup>1</sup> NMR (300 MHz, CDCl<sub>3</sub>, δ ppm): 5.17 (d, *J* = 3.9 Hz, 1H), 5.35 (d, *J* = 3.9 Hz, 1H), 6.92 (dd, *J* = 7.8, 1.2 Hz, 1H), 7.04-7.08 (m, 2H), 7.10-7.15 (m, 3H), 7.20 (td, *J* = 7.8, 1.8 Hz, 2H), 7.30 (td, *J* = 7.5, 1.2 Hz, 1H), 7.35 (d, *J* = 8.1 Hz, 1H), 7.47 (dd, *J* = 7.8, 1.5 Hz, 1H), 7.62 (dd, *J* = 8.1, 1.2 Hz, 1H), 7.72 (d, *J* = 7.8 Hz, 1H), 8.01 (brs, 1H)

***3-[2-(4-chlorophenyl)-4H-chromen-4-yl]-1H-indole (3e)***

Yield = 246 mg (69 %) Brown solid, Mp 80-81 °C (Lit 84-86 °C)<sup>1</sup>. H<sup>1</sup> NMR (300 MHz, CDCl<sub>3</sub>, δ ppm): 5.16 (d, *J* = 4.2 Hz, 1H), 5.66 (d, *J* = 3.9 Hz, 1H), 6.93 (td, *J* = 6.9, 1.5 Hz, 1H), 7.02-7.08 (m, 2H), 7.13 (td, *J* = 7.8, 1.5 Hz, 2H), 7.17-7.20 (m, 2H), 7.33 (dt, *J* = 8.7, 2.4 Hz, 2H), 7.37 (d, *J* = 0.6 Hz, 1H), 7.59 (d, *J* = 7.8 Hz, 1H), 7.65 (dt, *J* = 8.7, 2.4 Hz, 2H), 8.03 (brs, 1H)

***3-[2-(4-methoxyphenyl)-4H-chromen-4-yl]-1H-indole (3f)***

Yield = 247 mg (70 %) Brown solid, Mp 97-98 °C (Lit 97-98 °C)<sup>1</sup>. H<sup>1</sup> NMR (300 MHz, CDCl<sub>3</sub>, δ ppm): 3.82 (s, 3H), 5.15 (d, *J* = 3.9 Hz, 1H), 5.55 (d, *J* = 3.9 Hz, 1H), 6.87-6.95 (m, 3H), 7.02-7.21 (m, 6H), 7.35 (d, *J* = 8.1 Hz, 1H), 7.61-7.68 (m, 3H), 8.02 (brs, 1H).

***3-[2-(4-methylphenyl)-4H-chromen-4-yl]-1H-indole (3g)***

Yield = 235 mg (70 %) Gum-like red oil (lit)<sup>1</sup>. H<sup>1</sup> NMR (300 MHz, CDCl<sub>3</sub>, δ ppm): 2.36 (s, 3H), 5.15 (d, *J* = 3.9 Hz, 1H), 5.62 (d, *J* = 3.9 Hz, 1H), 6.90 (td, *J* = 8.1, 1.8 Hz, 1H), 7.04 (td, *J* = 7.8, 0.9 Hz, 2H), 7.09-7.24 (m, 6H), 7.34 (d, *J* = 7.8 Hz, 1H), 7.61 (dd, *J* = 8.1, 0.9 Hz, 3H), 7.98 (brs, 1H).

**General procedure for synthesis of 4H-chromene derivatives synthesis (3h-n)**

To a stirred solution of 2-hydroxy aldehyde (1 mmol), malononitrile (1 mmol, 66 μL) and indole (1 mmol, 117 mg) were added to the oleic acid (40 μL) in water (3 mL) at room temperature. The reaction mixture was stirred further 3 hours. After completion of the reaction, the reaction mixture was extracted with ethyl acetate (2 x 20 mL) and the combined extracts were washed with water (1 x 10 mL). The organic layer was dried over sodium sulphate, filtered and the solvent were removed under reduced pressure. After that the crude was purified through

the silica gel column chromatography eluted by ethyl acetate, hexane solvent mixture. Eventually dark yellow solid was obtained with good yield.

***2-amino-4-(1H-indol-3-yl)-4H-chromene-3-carbonitrile (3h)***

Yield = 236 mg (82 %) Yellow solid Mp 192–194 °C (Lit 193–194 °C)<sup>2</sup> H<sup>1</sup> NMR (300 MHz, DMSO(d<sub>6</sub>), δ ppm): 4.99 (s, 1H), 6.83-6.89 (m, 3H), 6.99-7.08 (m, 4H), 7.19-7.24 (m, 2H), 7.29-7.35 (m, 2H), 10.93 (s, 1H).

***2-amino-4-(1-methyl-1H-indol-3-yl)-4H-chromene-3-carbonitrile (3i)***

Yield = 256 mg (85 %) Yellow solid. Mp 200-202 °C (Lit 202°C)<sup>2</sup> H<sup>1</sup> NMR (300 MHz, DMSO(d<sub>6</sub>), δ ppm): 3.74 (s, 3H), 4.99 (s, 1H), 6.89-7.13 (m, 6H), 7.21 (t, *J* = 8.1 Hz, 1H), 7.28 (d, *J* = 9.9 Hz, 2H), 7.38 (d, *J* = 8.4 Hz, 1H).

***3-amino-1-(1H-indol-3-yl)-1H-benzo[f]chromene-2-carbonitrile (3j)***

Yield = 259 mg (77 %) Yellow solid. Mp 212–214 °C (Lit 215–217 °C)<sup>2</sup> H<sup>1</sup> NMR (300 MHz, DMSO(d<sub>6</sub>), δ ppm): 5.62 (s, 1H), 6.79-6.86 (m, 3H), 6.96 (t, *J* = 7.2 Hz, 1H), 7.20 (d, *J* = 8.1 Hz, 1H), 7.27 (d, *J* = 8.1 Hz, 1H), 7.35-7.44 (m, 4H), 7.84-7.90 (m, 2H), 8.10 (d, *J* = 7.8 Hz, 1H), 10.90 (s, 1H).

***2-amino-4-(1-methyl-1H-pyrrol-2-yl)-4H-chromene-3-carbonitrile (3k)***

Yield = 210 mg (85%) Yellow solid. Mp 196-198 °C, H<sup>1</sup> NMR (300 MHz, DMSO(d<sub>6</sub>), δ ppm): 3.43 (s, 3H), 4.97 (s, 1H), 5.76-5.87 (m, 2H), 6.59 (s, 1H), 6.92-7.11 (m, 5H), 7.56 (t, *J* = 7.5 Hz, 1H).

***2-amino-4-(1H-pyrrol-2-yl)-4H-chromene-3-carbonitrile (3l)***

Yield = 200 mg (84%) Gray colour solid. Mp 195-197°C (Lit 195-197 °C)<sup>2</sup> H<sup>1</sup> NMR (300 MHz, DMSO(d<sub>6</sub>), δ ppm): 4.75 (s, 1H), 5.82-5.88 (m, 2H), 6.59 (s, 1H), 6.88 (s, 2H), 6.98-7.09 (m, 2H), 7.16-7.24 (m, 2H), 10.69 (s, 1H).

***2-amino-4-(2-methyl-1H-indol-3-yl)-4H-chromene-3-carbonitrile (3m)***

Yield = 238 mg (79 %) Yellow solid. Mp 186–188°C (Lit 187–188 °C)<sup>2</sup> H<sup>1</sup> NMR (300 MHz, DMSO (d<sub>6</sub>), δ ppm): 2.44 (s, 3H), 5.06 (s, 1H), 6.76-6.79 (m, 3H), 6.90-7.06 (m, 5H), 7.16-7.24 (m, 2H), 10.85 (s, 1H).

***2-amino-4-(6-methoxy-1H-indol-3-yl)-4H-chromene-3-carbonitrile (3n)***

Yield = 257 mg (81 %) Yellow solid. Mp 199-201 °C (Lit 198-200 °C)<sup>2</sup> H<sup>1</sup> NMR (300 MHz, DMSO(d<sub>6</sub>), δ ppm): 3.65 (s, 3H), 4.96 (s, 1H), 6.68-6.76 (m, 2H), 6.83 (s, 2H), 6.99-7.12 (m, 3H), 7.21 (t, *J* = 10.5 Hz, 3H), 10.76 (s, 1H).

**Intermediate isolation from the reaction mixture (Scheme 3 in main article)**

**5-[(2-hydroxyphenyl)methylidene]-1,3-diazinane-2,4,6-trione (6)**

Yield = 180 mg (78 %) Orange solid. Mp >260 °C  $^1\text{H}$  NMR (300 MHz, DMSO(d<sub>6</sub>),  $\delta$  ppm): 6.82 (t,  $J = 7.5$  Hz, 1H), 6.93 (d,  $J = 8.1$  Hz, 1H), 7.37 (t,  $J = 7.5$  Hz, 1H), 8.16 (d,  $J = 8.1$  Hz, 1H), 8.61 (s, 1H), 10.63 (s, 1H), 11.15 (s, 1H), 11.31 (s, 1H).

**General procedure for synthesis of Synthesis of 5-(2,3,4,5-tetrahydro-1H-chromeno-[2,3-d]pyrimidin-5-yl)pyrimidiones (7a-c)**

To a stirred solution of salicylaldehyde or 5-bromo salicylaldehyde (0.5 mmol) and barbituric acid or thiobarbituric acid (1 mmol) in water (3 mL), oleic acid (40  $\mu\text{L}$ ) was added and the mixture was heated at 50 °C for 1 hour. After completion the reaction indicated by TLC, the reaction mixture was cooled and filtered. The precipitate was washed with ethanol to afford pure product.

**5-(2,4-Dioxo-2,3,4,5-tetrahydro-1H-chromeno[2,3-d]pyrimidin-5-yl)pyrimidine-2,4,6(1H,3H,5H)-trione (7a)**

Yield = 157 mg (92 %) white solid. Mp >225°C (Lit 268-270 °C)<sup>3</sup>  $^1\text{H}$  NMR (300 MHz, DMSO(d<sub>6</sub>),  $\delta$  ppm): 3.85 (d,  $J = 2.1$  Hz, 1H), 4.71 (d,  $J = 2.1$  Hz, 1H), 7.08- 7.24 (m, 3H), 7.31- 7.36 (m, 1H), 10.99 (s, 1H), 11.19 (s, 1H), 11.30 (s, 1H), 11.98 (s, 1H).

**5-{4-oxo-2-sulfanylidene-1H,2H,3H,4H,5H-chromeno[2,3-d]pyrimidin-5-yl}-2-sulfanylidene-1,3-diazinane-4,6-dione (7b)**

Yield = 170 mg (91 %) white solid. Mp >225°C (Lit > 300 °C)<sup>3</sup>  $^1\text{H}$  NMR (300 MHz, DMSO (d<sub>6</sub>),  $\delta$  ppm): 5.12 (s, 1H), 6.99 (d,  $J = 7.5$  Hz, 1H), 7.11 (s, 2H), 7.22 (s, 1H), 11.94 (brs, 1H), 12.24 (brs, 1H), 12.34 (s, 1H), 13.29 (s, 1H).

**5-(2,4-Dioxo-7-bromo-2,3,4,5-tetrahydro-1H-chromeno[2,3-d]pyrimidin-5-yl)pyrimidine-2,4,6(1H,3H,5H)-trione (7c)**

Yield = 185 mg (88 %) white solid. Mp >225°C (Lit > 240-242 °C)<sup>3</sup>  $^1\text{H}$  NMR (300 MHz, DMSO(d<sub>6</sub>),  $\delta$  ppm): 3.93 (brs, 1H), 4.72 (brs, 1H), 7.10 (s, 1H), 7.29 (s, 1H), 7.52 (d,  $J = 3.9$  Hz, 1H), 11.10 (s, 1H), 11.23 (s, 1H), 11.37 (s, 1H), 12.06 (s, 1H)

**General procedure for synthesis of C-glycosylated pyrimidine-fused heterocycle (8)**

To a stirred mixture of barbituric acid (1 mmol, 128 mg), D- glucose (0.5 mmol, 90 mg) and oleic acid (40  $\mu$ L) in ethanol (3 mL) at 50  $^{\circ}$ C was stirred 12 h. After completion the reaction confirmed by TLC, the reaction mixture cooled at room temperature and filtered. The mixture washed with ethanol thrice and evaporated reduced pressure affords a pure product.

***5-((1R,2S,3S,4S)-1,2,3,4,5-Pentahydroxypentyl)-5,9-dihydro-2H-pyrano[2,3-d:6,5-d']dipyrimidine-2,4,6,8(1H,3H,7H)-tetraone (8)***

Yield = 284 mg (71 %) white solid. Mp 200-201 $^{\circ}$ C (Lit 202-204 $^{\circ}$ C)<sup>4</sup>  $^1$ H NMR (300 MHz, DMSO(d<sub>6</sub>),  $\delta$  ppm): 2.50-2.98 (m, 2H), 3.11 (t,  $J$  = 7.1 Hz, 1H), 3.26-3.30 (m, 1H), 3.39-3.35 (m, 2H), 3.61-3.70 (m, 5H), 3.89(s, 1H), 11.07 (s, 2H), 11.12 (s, 1H), 11.21(s, 1H).

**General procedure for synthesis of pyrazolo pyranopyrimidine derivatives synthesis 10a-f**

To a stirred solution of hydrazine hydrate (1 mmol, 50  $\mu$ L) and ethylacetoacetate (1 mmol, 130  $\mu$ L) in water (3 mL), oleic acid (40  $\mu$ L) was added and the mixture was refluxed over 30 min. Next an appropriate amount aromatic aldehyde (1 mmol), barbituric acid (128 mg, 1mmol) were added in the reaction mixture was further refluxed for an appropriate time. After completion the reaction indicated by TLC, the reaction mixture was cooled and filtered. The precipitate was washed with ethanol to afford pure product.

***3-Methyl-4-(4-nitrophenyl)-1,4-dihydropyrazolo[4',3':5,6]pyrano[2,3-d]pyrimidine-5,7(6H,8H)-dione(10 a)***

Yield = 296 mg (87 %) white solid. Mp >225 $^{\circ}$ C (Lit 233-234 $^{\circ}$ C)<sup>5</sup>  $^1$ H NMR (300 MHz, DMSO (d<sub>6</sub>),  $\delta$  ppm): 2.25 (s, 3H), 5.51 (s, 1H), 7.31(d,  $J$  = 8.7 Hz, 2H), 8.11 (d,  $J$  = 8.4 Hz, 2H), 10.25 (s, 2H), 13.40 (brs, 1H).

***3-Methyl-4-(3-nitrophenyl)-1,4-dihydropyrazolo[4',3':5,6]pyrano[2,3-d]pyrimidine-5,7(6H,8H)-dione (10 b)***

Yield = 283 mg (83 %) white solid. Mp >225 $^{\circ}$ C (Lit 266-267 $^{\circ}$ C)<sup>5</sup>  $^1$ H NMR (300 MHz, DMSO (d<sub>6</sub>),  $\delta$  ppm): 2.09 (s, 3H), 5.30 (s, 1H), 7.31(s, 2H), 7.63 (s, 1H), 7.91 (s, 1H), 10.05 (s, 2H), 13.19 (brs, 1H).

***3-Methyl-4-phenyl-1,4-dihydropyrazolo[4',3':5,6]pyrano[2,3-d]pyrimidine-5,7(6H,8H)-dione (10c)***

Yield = 230 mg (78 %) white solid. Mp 216-218°C (Lit 218-219°C)<sup>5</sup> H<sup>1</sup> NMR (300 MHz, DMSO (d<sub>6</sub>), δ ppm): 2.23 (s, 3H), 5.43 (s, 1H), 7.04-7.13(m, 3H), 7.18-7.23 (m, 2H), 10.18 (s, 2H), 13.14 (brs, 1H).

***3-Methyl-4-(4-methylphenyl)-1,4-dihydropyrazolo[4',3':5,6]pyrano[2,3-d]pyrimidine-5,7(6H,8H)-dione(10 d)***

Yield = 254 mg (82 %) white solid. Mp 197-198 °C (Lit 200-201°C)<sup>5</sup> H<sup>1</sup> NMR (300 MHz, DMSO (d<sub>6</sub>), δ ppm): 2.08 (s, 3H), 2.11 (s, 3H), 4.73 (s, 1H), 7.03-7.24 (m, 4H), 10.93 (s, 2H), 11.74 (brs, 1H).

***3-Methyl-4-(2-nitrophenyl)-6,8-dihydropyrazolo[4, '3':5,6]pyrano[2,3-d]pyrimidine-5,7(1H,4H)-dione (10 e)***

Yield = 291mg (85 %) pale yellow solid. Mp 207-208°C (Lit 208-209°C)<sup>5</sup> H<sup>1</sup> NMR (300 MHz, DMSO (d<sub>6</sub>), δ ppm): 2.21 (s, 3H), 5.77 (s, 1H), 7.33-7.41 (m, 2H), 7.50-7.76 (m, 2H) 10.16 (s, 2H), 13.19 (brs, 1H)

***4-(4-Chlorophenyl)-3-methyl-6,8-dihydropyrazolo[4',3'5,6]-pyrano[2,3-d]pyrimidine-5,7(1H,4H)-dione(10 f)***

Yield = 264 mg (80 %) white solid. Mp 220-222°C (Lit 222-223°C)<sup>5</sup> H<sup>1</sup> NMR (300 MHz, DMSO (d<sub>6</sub>), δ ppm): 2.08 (s, 3H), 2.11 (s, 3H), 4.73 (s, 1H), 7.03-7.24 (m, 4H), 10.93 (s, 2H), 11.74 (brs, 1H).

***Procedure for synthesis of curcumin-based pyranof[2,3-d]pyrimidine 11:***

To a magnetically stirred solution of curcumin (0.5 mmol, 184 mg), 4-chlorobenzaldehyde (0.5 mmol, 70 mg) and barbituric acid (0.5 mmol, 62 mg) in EtOH (2 ml) was oleic acid (40 μL) at reflux temperature of EtOH. The mixture was stirred for 6 h. After completion of the reaction (monitored by TLC), the reaction mixture cooled down to room temperature and then the precipitate filtered, washed with EtOH (3 x 5 mL) thrice and dried under vacuum.

**Progress of the reaction monitored as photograph.**

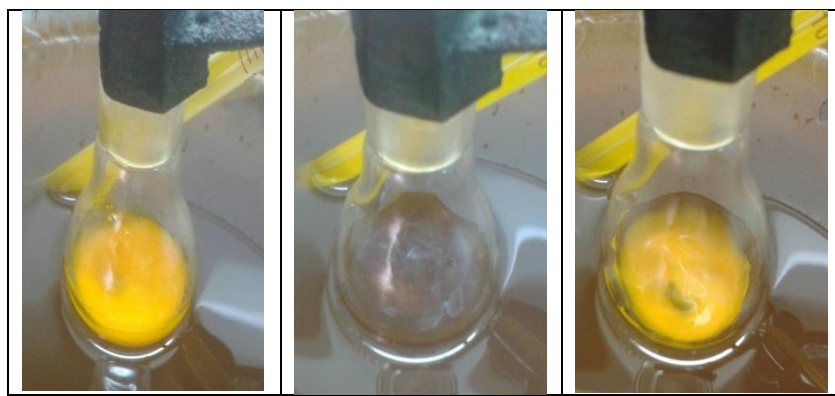

**A**

**B**

**C**

- A) Initial reaction mixture of curcumin, 4-chlorobenzaldehyde, barbituric acid and oleic acid in ethanol
- B) Homogeneous solution of the reaction mixture after 2 hours.
- C) After completion of the reaction precipitate was formed

***7-((E)-4-Hydroxy-3-methoxystyryl)-5-(4-chlorophenyl)-6-((E)-3-(4-hydroxy-3-methoxyphenyl)acryloyl)-1H-pyrano [2,3-d]pyrimidine-2,4(3H,5H)-dione (11)***

Yield = 261 mg (87 %) yellow solid. Mp 228-230 °C (lit 152-156 °C) <sup>6</sup> H<sup>1</sup> NMR (300 MHz, DMSO(d<sub>6</sub>), δ ppm): 3.71 (s, 6H), 5.19 (s, 1H), 6.14(d, *J* = 15.6, 1H), 6.50 (d, *J* = 8.1 Hz, 2H), 6.61-6.82 (m, 5H), 6.88-6.97 (m, 2H), 7.23-7.38 (m, 4H), 9.09 (s, 1H), 9.67 (s, 1H), 11.25 (s, 1H), 11.32 (s, 1H).

**References:**

1. D. Jiang, X. Pan, M. Li and Y. Gu, *ACS Comb. Sci.*, **2014**, *16*, 287–292.
2. N. G. Singh, R. Nongrum, C. Kathing, J. W. S. Rani and R. Nongkhlaw, *Green Chem. Lett. Rev.*, **2014**, *7*, 137–144
3. C. Qingfang, W. Qifa, T. Ting, W. Mingxiao, C. Na; *Chin. J. Chem.* **2012**, *30*, 386–390.
4. M. Nourisefat, F. Panahi and A. Khalafi-Nezhad, *Org. Biomol. Chem.*, **2014**, *12*, 9419–9426.
5. X.-T. Li, A.-D. Zhao, L.-P. Mo and Z.-H. Zhang, *RSC Adv.*, **2014**, *4*, 51580–51588.
6. A. Yousefi, R. Yousefi, F. Panahi, S. Sarikhani, A. R. Zolghadr, A. Bahaoddini, A. K. Nezhad, *Int. J. Biol. Macromol.* **2015**, *78*, 46-55.



Light microscopic images of oleic acid in water

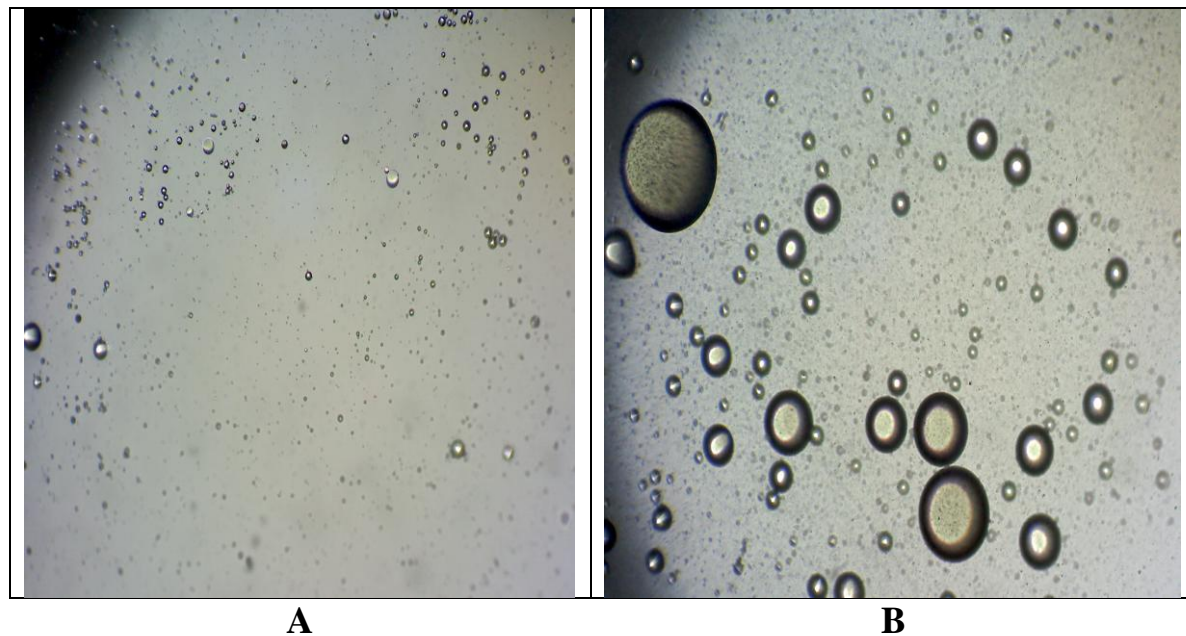

- A) Light microscopic image of oleic acid(40  $\mu$ L) in water (3 mL)
- B) Light microscopic image of Indole (1 mmol), salicylaldehyde (1 mmol) and oleic acid (40  $\mu$ L) in water (3 mL)

7.991  
7.737  
7.713  
7.637  
7.611  
7.399  
7.377  
7.367  
7.351  
7.340  
7.319  
7.251  
7.234  
7.194  
7.170  
7.144  
7.117  
7.104  
7.074  
7.061  
7.052  
7.024  
6.948  
6.948  
6.943  
6.921  
6.901  
6.895  
6.689  
5.675  
5.176  
5.163

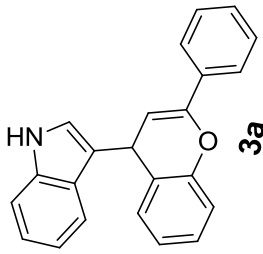

Current Data Parameters  
 NAME 1200A  
 EXPNO 1  
 PROCNO 1

F2 - Acquisition Parameters  
 Date\_ 20141202  
 Time 11.30  
 INSTRUM spect  
 PROBHD 5 mm BBO BB-1H  
 PULPROG zg30  
 TD 65536  
 SOLVENT CDCl3  
 NS 16  
 DS 2  
 SWH 6188.119 Hz  
 FIDRES 0.094423 Hz  
 AQ 5.2953587 sec  
 RG 322  
 DW 80.800 usec  
 DE 6.00 usec  
 TE 300.0 K  
 D1 1.0000000 sec  
 TD0 1

===== CHANNEL f1 =====  
 NUC1 1H  
 P1 8.60 usec  
 PL1 -2.00 dB  
 SF01 300.1318534 MHz

F2 - Processing parameters  
 SI 32768  
 SF 300.1300092 MHz  
 WDW EM  
 SSB 0  
 LB 0.30 Hz  
 GB 0  
 PC 1.00

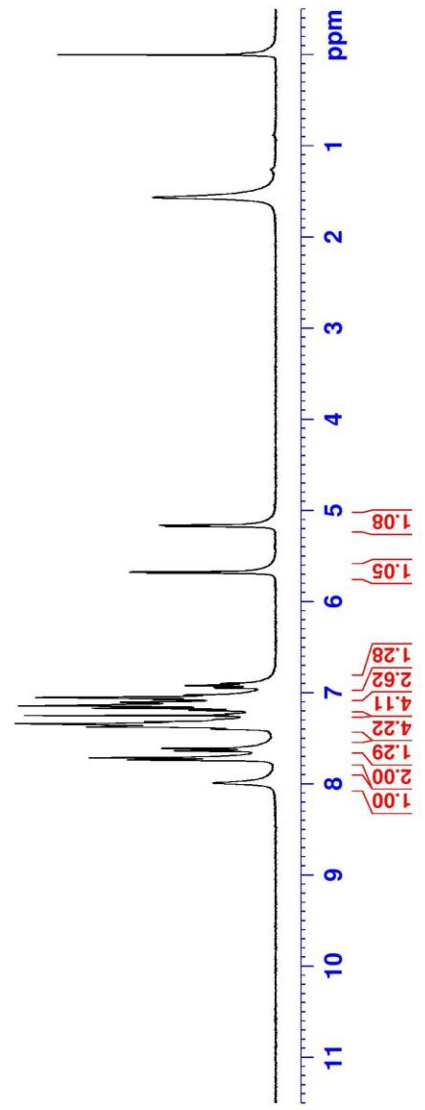

0.000  
2.399  
5.187  
5.199  
5.560  
5.572  
6.881  
6.886  
6.892  
6.907  
6.913  
6.942  
6.960  
6.983  
6.986  
7.046  
7.049  
7.073  
7.097  
7.100  
7.105  
7.131  
7.131  
7.151  
7.156  
7.253  
7.276  
7.318  
7.336  
7.341  
7.346  
7.353  
7.378  
7.394  
7.400  
7.407  
7.436  
7.462  
7.709  
7.713  
7.735  
7.741  
7.786

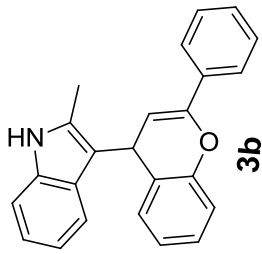

Current Data Parameters  
 NAME 1200F  
 EXPNO 1  
 PROCNO 1

F2 - Acquisition Parameters  
 Date\_ 20141204  
 Time 16.32  
 INSTRUM spect  
 PROBHD 5 mm BBO BB-IH  
 PULPROG zg30  
 TD 65536  
 SOLVENT CDCl3  
 NS 16  
 DS 2  
 SWH 6188.119 Hz  
 FIDRES 0.094423 Hz  
 AQ 5.2953587 sec  
 RG 287  
 DW 80.800 usec  
 DE 6.00 usec  
 TE 300.0 K  
 D1 1.00000000 sec  
 TD0 1

===== CHANNEL f1 =====  
 NUC1 1H  
 P1 8.60 usec  
 PL1 -2.00 dB  
 SF01 300.1318534 MHz

F2 - Processing parameters  
 SI 32768  
 SF 300.1300082 MHz  
 WDW EM  
 SSB 0  
 LB 0.30 Hz  
 GB 0  
 PC 1.00

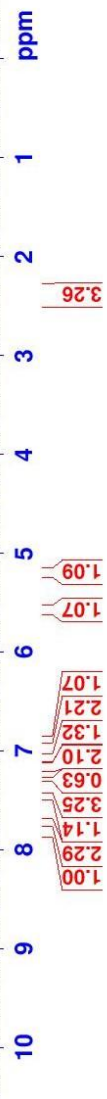

3.740  
 5.121  
 5.134  
 5.667  
 5.680  
 6.809  
 6.817  
 6.838  
 6.846  
 6.912  
 6.918  
 6.938  
 6.960  
 6.966  
 7.052  
 7.061  
 7.072  
 7.116  
 7.138  
 7.144  
 7.151  
 7.155  
 7.173  
 7.178  
 7.201  
 7.205  
 7.229  
 7.298  
 7.322  
 7.332  
 7.340  
 7.345  
 7.355  
 7.380  
 7.396  
 7.402  
 7.409  
 7.712  
 7.716  
 7.738  
 7.744  
 7.916

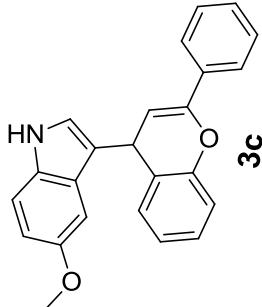

Current Data Parameters  
 NAME 1247f  
 EXPNO 1  
 PROCNO 1  
 F2 - Acquisition Parameters  
 Date\_ 20141217  
 Time 15.59  
 INSTRUM spect  
 PROBHD 5 mm BBO BB-1H  
 PULPROG zg30  
 TD 65536  
 SOLVENT CDCl3  
 NS 16  
 DS 2  
 SWH 6188.119 Hz  
 FIDRES 0.094423 Hz  
 AQ 5.2953587 sec  
 RG 406  
 DW 80.800 usec  
 DE 6.00 usec  
 TE 300.0 K  
 D1 1.00000000 sec  
 TD0 1  
 ===== CHANNEL f1 =====  
 NUC1 1H  
 P1 8.60 usec  
 PL1 -2.00 dB  
 SFO1 300.1318534 MHz  
 F2 - Processing parameters  
 SI 32768  
 SF 300.1300059 MHz  
 WDW EM  
 SSB 0  
 LB 0.30 Hz  
 GB 0  
 PC 1.00

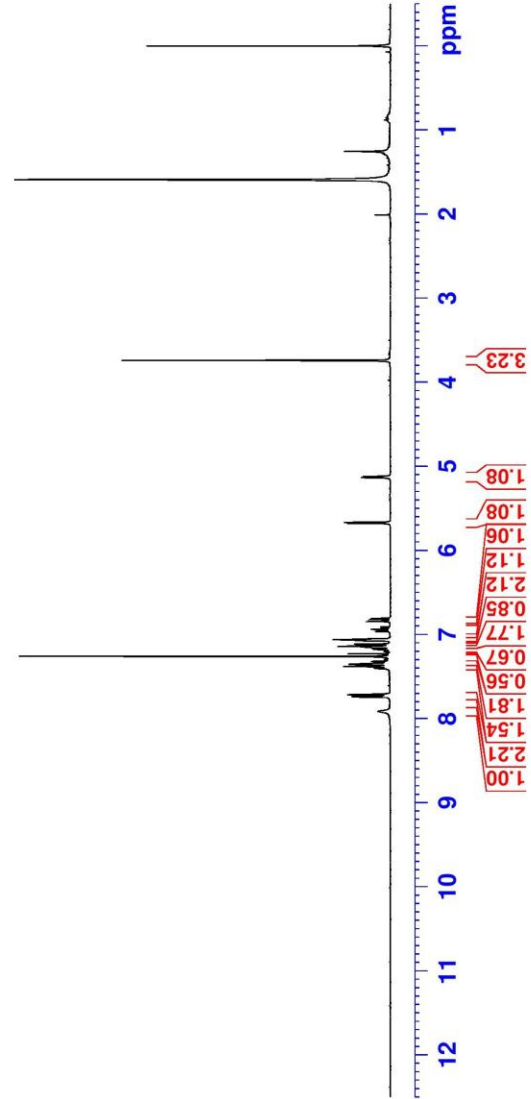

7.740  
7.714  
7.639  
7.635  
7.612  
7.608  
7.492  
7.487  
7.467  
7.461  
7.371  
7.344  
7.304  
7.300  
7.279  
7.251  
7.235  
7.229  
7.209  
7.203  
7.184  
7.180  
7.157  
7.153  
7.149  
7.136  
7.128  
7.116  
7.114  
7.110  
7.108  
7.104  
7.081  
7.078  
7.070  
7.066  
6.925  
5.360  
5.347  
5.177  
5.164  
0.000

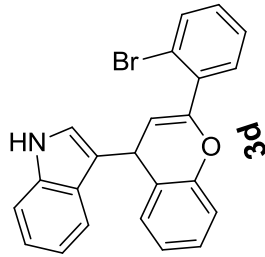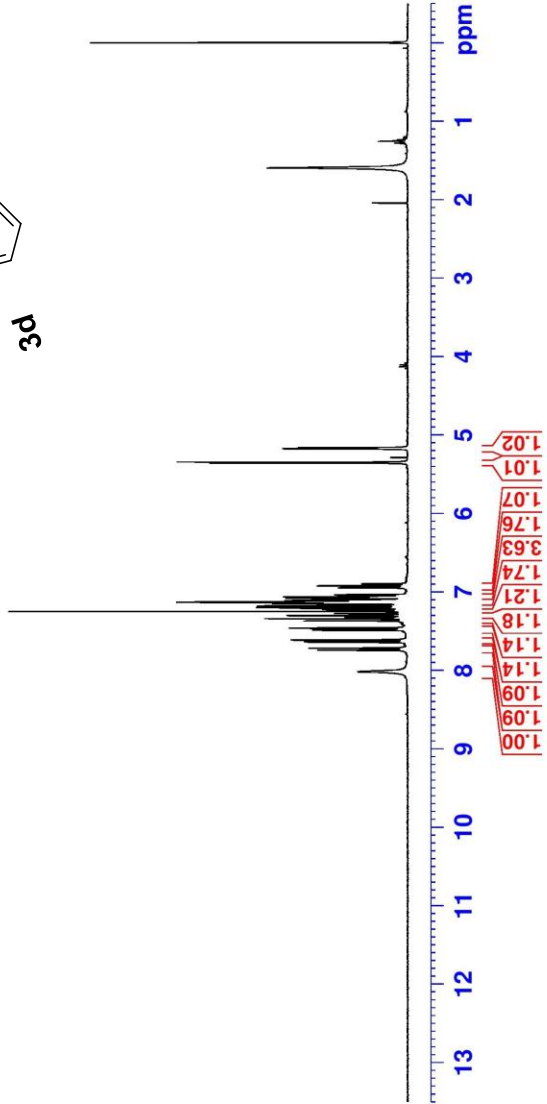

Current Data Parameters  
 NAME 1200K  
 EXPNO 1  
 PROCNO 1

F2 - Acquisition Parameters  
 Date\_ 20141213  
 Time 14.41  
 INSTRUM spect  
 PROBHD 5 mm BBO BB-1H  
 PULPROG zg30  
 TD 65536  
 SOLVENT CDCl3  
 NS 16  
 DS 2  
 SWH 6188.119 Hz  
 FIDRES 0.094423 Hz  
 AQ 5.2953587 sec  
 RG 203  
 DW 80.800 usec  
 DE 6.00 usec  
 TE 300.0 K  
 D1 1.0000000 sec  
 TD0 1

===== CHANNEL f1 =====  
 NUC1 1H  
 P1 8.60 usec  
 PL1 -2.00 dB  
 SFO1 300.1318534 MHz

F2 - Processing parameters  
 SI 32768  
 SF 300.1300089 MHz  
 WDW EM  
 SSB 0  
 LB 0.30 Hz  
 GB 0  
 PC 1.00

5.154  
 5.168  
 5.662  
 5.675  
 6.911  
 6.929  
 6.932  
 6.934  
 6.955  
 6.960  
 7.025  
 7.028  
 7.049  
 7.052  
 7.055  
 7.063  
 7.075  
 7.078  
 7.101  
 7.104  
 7.127  
 7.132  
 7.152  
 7.156  
 7.176  
 7.179  
 7.200  
 7.203  
 7.259  
 7.323  
 7.330  
 7.352  
 7.361  
 7.376  
 7.378  
 7.578  
 7.604  
 7.637  
 7.644  
 7.660  
 7.666  
 8.033

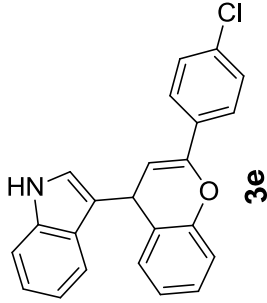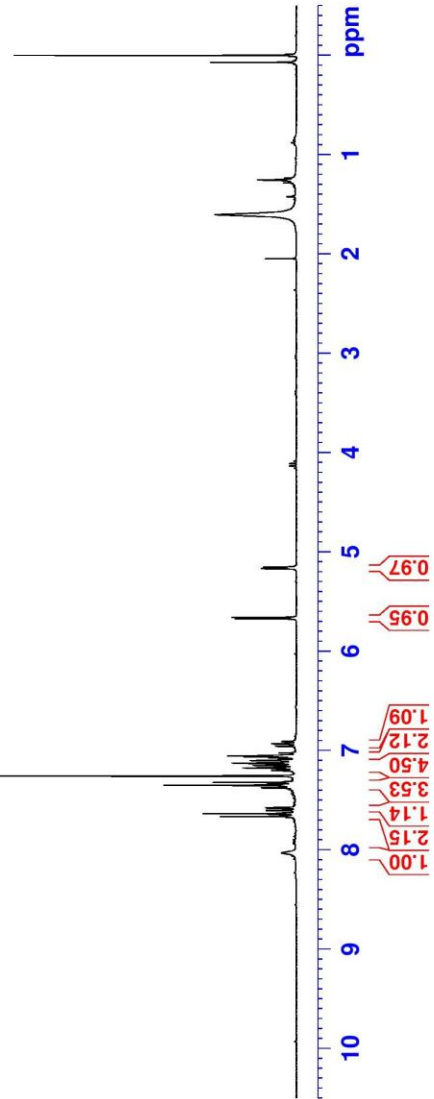

Current Data Parameters  
 NAME 1200M  
 EXPNO 1  
 PROCNO 1  
 F2 - Acquisition Parameters  
 Date\_ 20141215  
 Time 14.15  
 INSTRUM spect  
 PROBHD 5 mm BBO BB-1H  
 PULPROG zg30  
 TD 65536  
 SOLVENT CDCl3  
 NS 16  
 DS 2  
 SWH 6188.119 Hz  
 FIDRES 0.094423 Hz  
 AQ 5.2953587 sec  
 RG 362  
 DW 80.800 usec  
 DE 6.00 usec  
 TE 300.0 K  
 D1 1.0000000 sec  
 TD0 1  
 ===== CHANNEL f1 =====  
 NUC1 1H  
 P1 8.60 usec  
 PL1 -2.00 dB  
 SFO1 300.1318534 MHz  
 F2 - Processing parameters  
 SI 32768  
 SF 300.1300067 MHz  
 WDW EM  
 SSB 0  
 LB 0.30 Hz  
 GB 0  
 PC 1.00

8.023  
 7.680  
 7.670  
 7.663  
 7.647  
 7.640  
 7.609  
 7.367  
 7.340  
 7.257  
 7.210  
 7.193  
 7.189  
 7.166  
 7.142  
 7.138  
 7.129  
 7.124  
 7.099  
 7.072  
 7.069  
 7.061  
 7.053  
 7.046  
 7.022  
 7.019  
 6.951  
 6.940  
 6.934  
 6.927  
 6.917  
 6.887  
 6.878  
 5.563  
 5.550  
 5.500  
 5.156  
 5.143  
 3.827

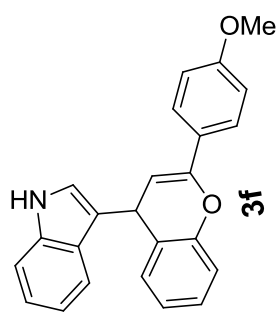

Current Data Parameters  
 NAME 1247C  
 EXPNO 1  
 PROCNO 1  
 F2 - Acquisition Parameters  
 Date\_ 20141216  
 Time 15.42  
 INSTRUM spect  
 PROBHD 5 mm BBO BB-1H  
 PULPROG zg30  
 TD 65536  
 SOLVENT CDCl3  
 NS 16  
 DS 2  
 SWH 6188.119 Hz  
 FIDRES 0.094423 Hz  
 AQ 5.2953587 sec  
 RG 287  
 DW 80.800 usec  
 DE 6.00 usec  
 TE 300.0 K  
 D1 1.00000000 sec  
 TD0 1  
 ===== CHANNEL f1 =====  
 NUC1 1H  
 P1 8.60 usec  
 PL1 -2.00 dB  
 SFO1 300.1318534 MHz  
 F2 - Processing parameters  
 SI 32768  
 SF 300.1300071 MHz  
 WDW EM  
 SSB 0  
 LB 0.30 Hz  
 GB 0  
 PC 1.00

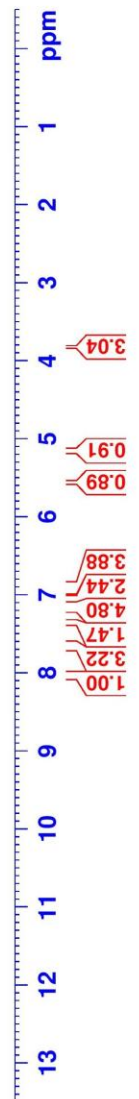

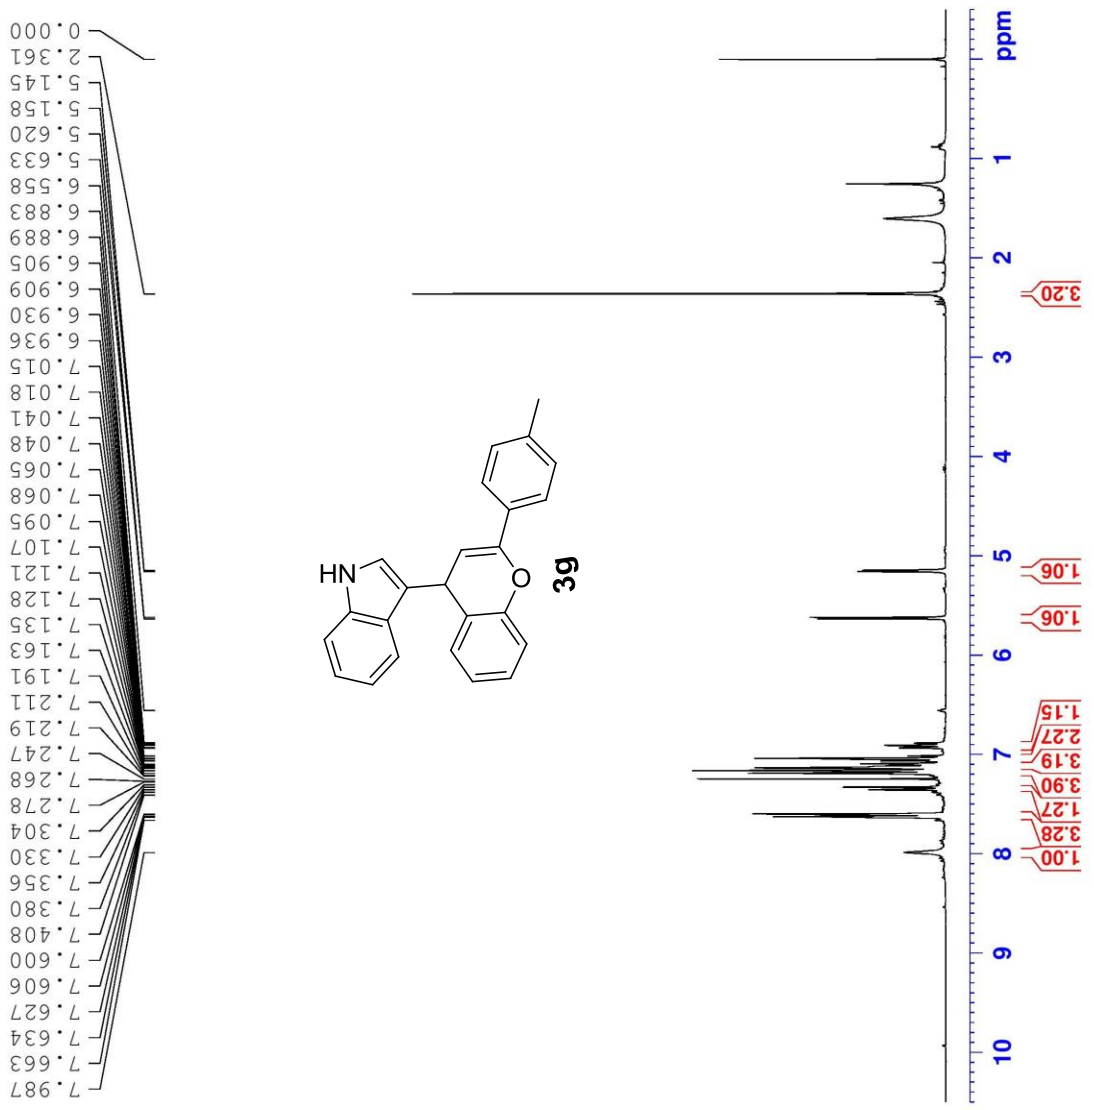

Current Data Parameters  
 NAME 12001  
 EXPNO 1  
 PROCNO 1

F2 - Acquisition Parameters  
 Date\_ 20141206  
 Time 15.16  
 INSTRUM spect  
 PROBHD 5 mm BBO BB-1H  
 PULPROG zg30  
 TD 65536  
 SOLVENT CDCl3  
 NS 16  
 DS 2  
 SWH 6188.119 Hz  
 FIDRES 0.094423 Hz  
 AQ 5.2953587 sec  
 RG 256  
 DW 80.800 usec  
 DE 6.00 usec  
 TE 300.0 K  
 D1 1.0000000 sec  
 TD0 1

===== CHANNEL f1 =====  
 NUC1 1H  
 P1 8.60 usec  
 PL1 -2.00 dB  
 SFO1 300.1318534 MHz

F2 - Processing parameters  
 SI 32768  
 SF 300.1300101 MHz  
 WDW EM  
 SSB 0  
 LB 0.30 Hz  
 GB 0  
 PC 1.00



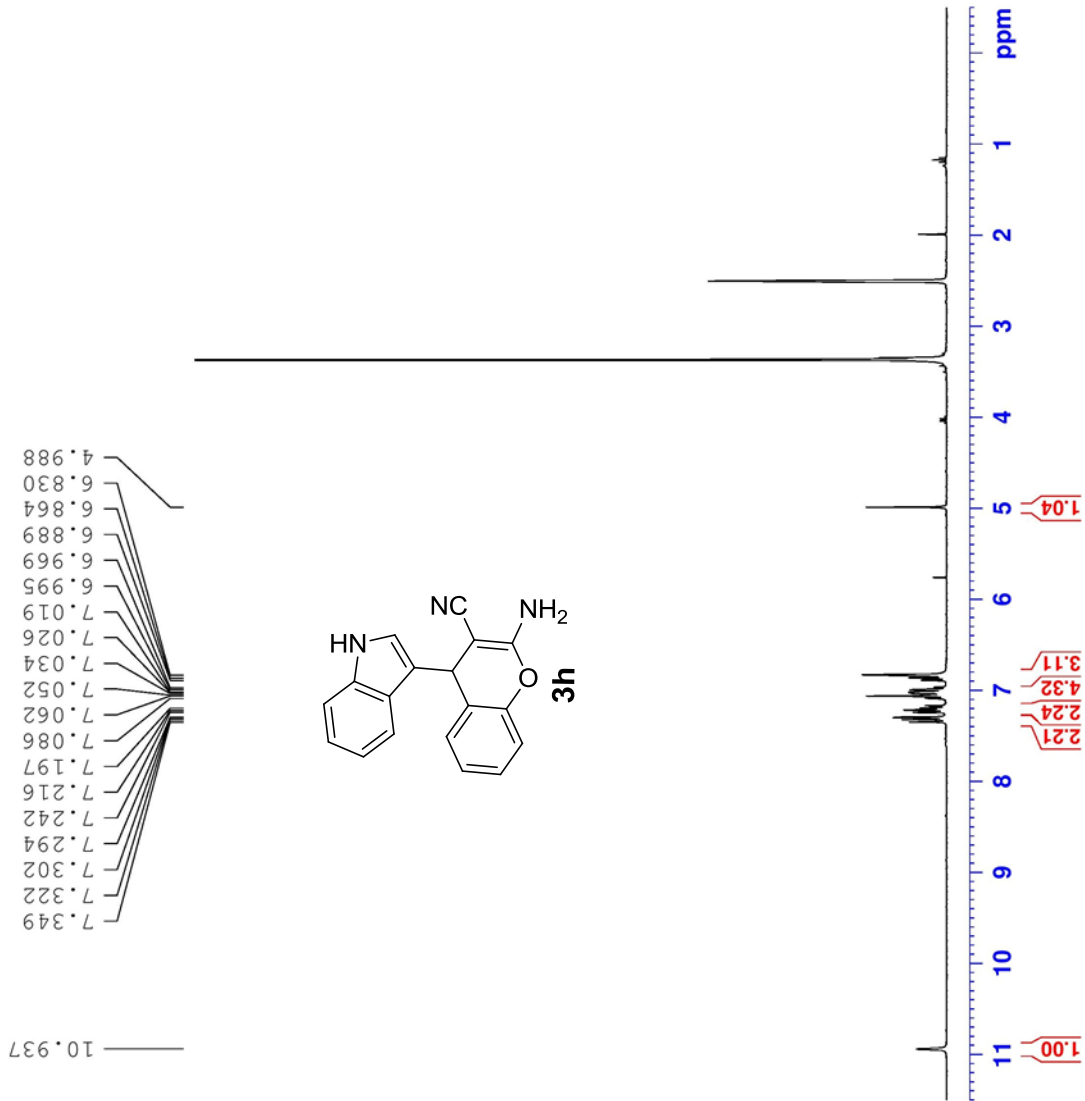

Current Data Parameters  
 NAME 1200J  
 EXPNO 1  
 PROCNO 1

F2 - Acquisition Parameters  
 Date\_ 20141213  
 Time 10.58  
 INSTRUM spect  
 PROBHD 5 mm BBO BB-1H  
 PULPROG zg30  
 TD 65536  
 SOLVENT DMSO  
 NS 16  
 DS 2  
 SWH 6188.119 Hz  
 FIDRES 0.094423 Hz  
 AQ 5.2953587 sec  
 RG 228  
 DW 80.800 usec  
 DE 6.00 usec  
 TE 300.0 K  
 D1 1.0000000 sec  
 TD0 1

===== CHANNEL f1 =====  
 NUC1 1H  
 P1 8.60 usec  
 PL1 -2.00 dB  
 SFO1 300.1318534 MHz

F2 - Processing parameters  
 SI 32768  
 SF 300.1300000 MHz  
 WDW EM  
 SSB 0  
 LB 0.30 Hz  
 GB 0  
 PC 1.00

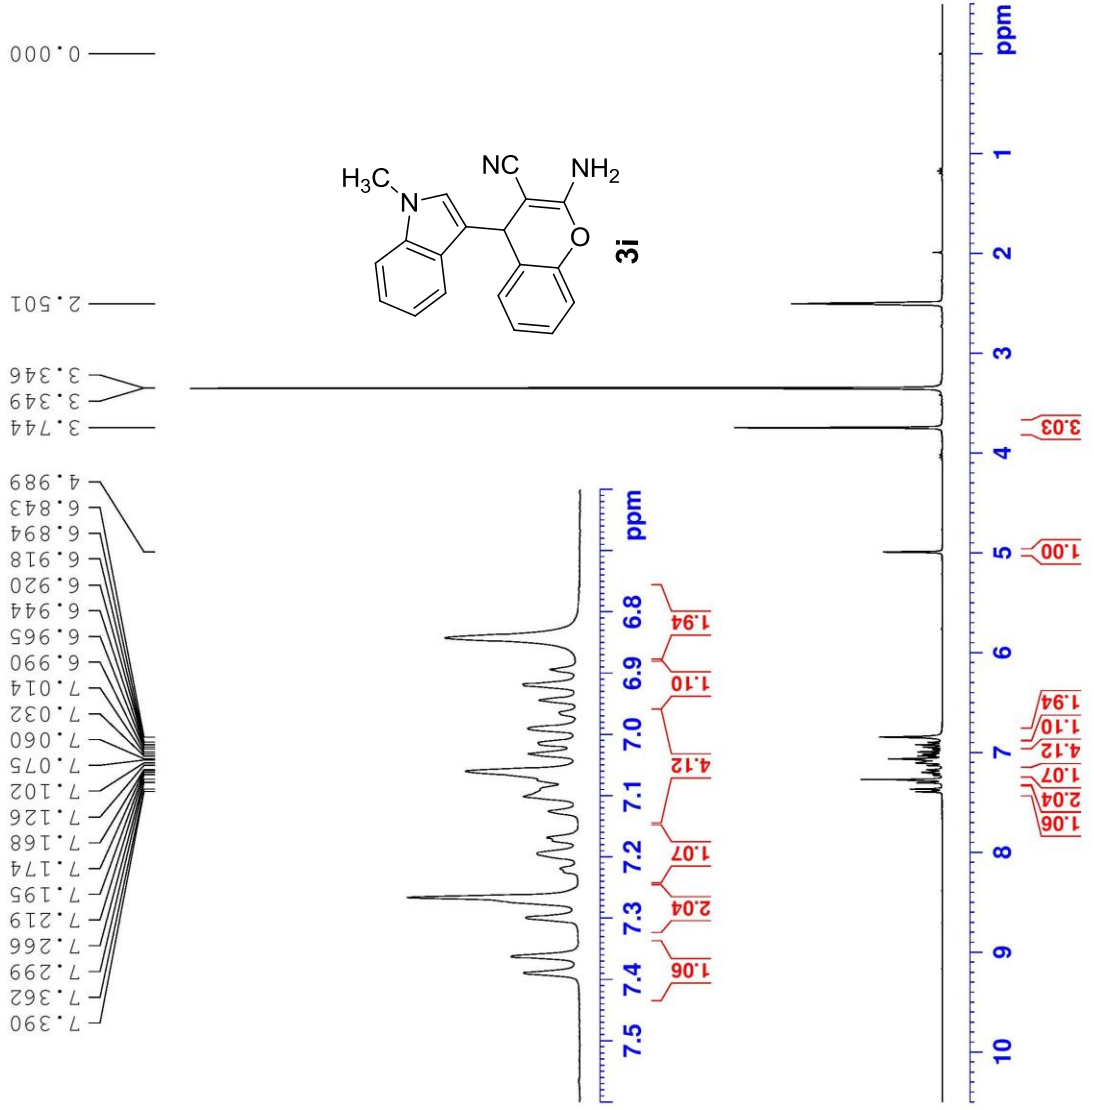

Current Data Parameters  
 NAME 0805L  
 EXPNO 1  
 PROCNO 1

F2 - Acquisition Parameters  
 Date\_ 20150703  
 Time 16.24  
 INSTRUM spect  
 PROBHD 5 mm BBO BB-1H  
 PULPROG zg30  
 TD 65536  
 SOLVENT DMSO  
 NS 16  
 DS 2  
 SWH 6188.119 Hz  
 FIDRES 0.094423 Hz  
 AQ 5.2953587 sec  
 RG 287  
 DW 80.800 usec  
 DE 6.00 usec  
 TE 300.0 K  
 D1 1.0000000 sec  
 TD0 1

===== CHANNEL f1 =====  
 NUC1 1H  
 P1 8.60 usec  
 PL1 -2.00 dB  
 SFO1 300.1318534 MHz

F2 - Processing parameters  
 SI 32768  
 SF 300.1300008 MHz  
 WDW EM  
 SSB 0  
 LB 0.30 Hz  
 GB 0  
 PC 1.00

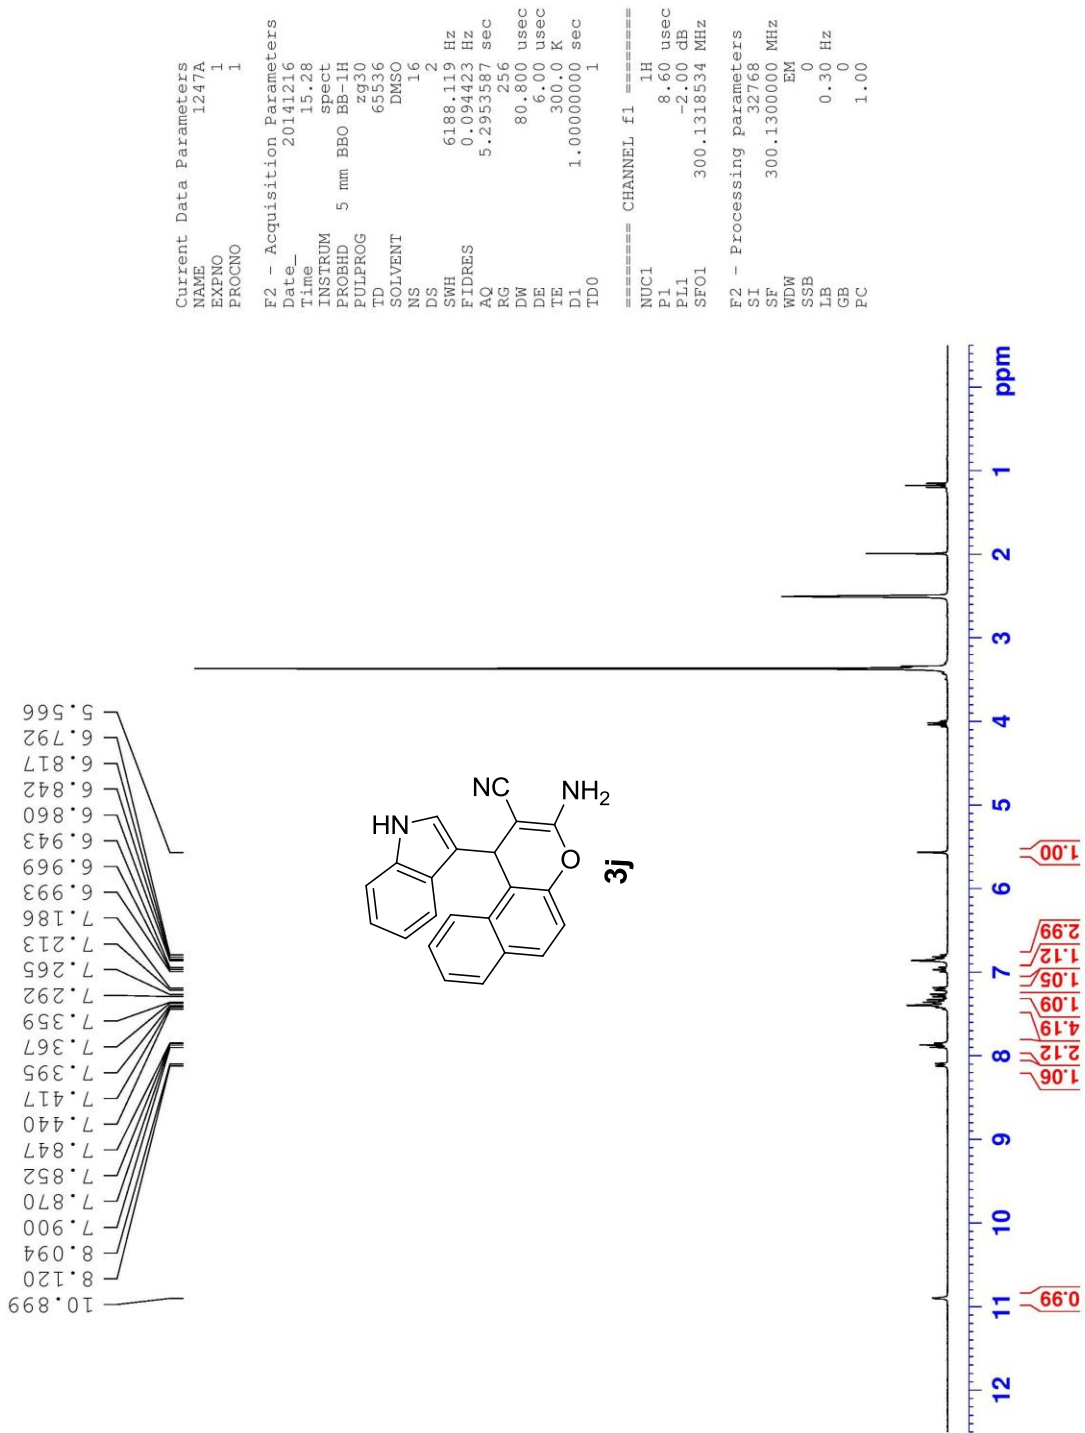

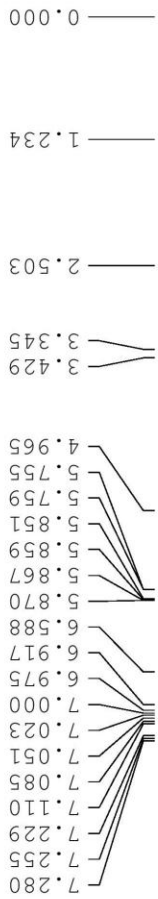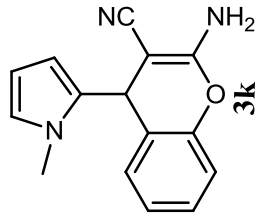

Current Data Parameters  
 NAME 0369H-1  
 EXPNO 1  
 PROCNO 1

F2 - Acquisition Parameters  
 Date\_ 20150708  
 Time 14.19  
 INSTRUM spect  
 PROBHD 5 mm BBO BB-1H  
 PULPROG zg30  
 TD 65536  
 SOLVENT DMSO  
 NS 16  
 DS 2  
 SWH 6188.119 Hz  
 FIDRES 0.094423 Hz  
 AQ 5.2953587 sec  
 RG 228  
 DW 80.800 usec  
 DE 6.00 usec  
 TE 300.0 K  
 D1 1.00000000 sec  
 TD0 1

===== CHANNEL f1 =====  
 NUC1 1H  
 P1 8.60 usec  
 PL1 -2.00 dB  
 SF01 300.1318534 MHz

F2 - Processing parameters  
 SI 32768  
 SF 300.1299999 MHz  
 WDW EM  
 SSB 0  
 LB 0.30 Hz  
 GB 0  
 PC 1.00

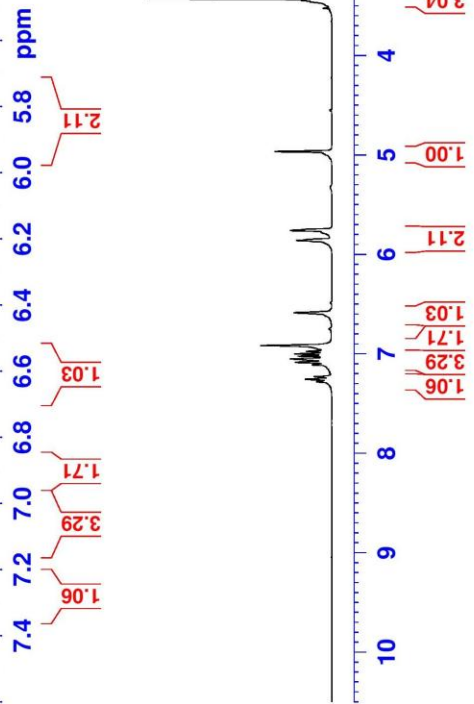

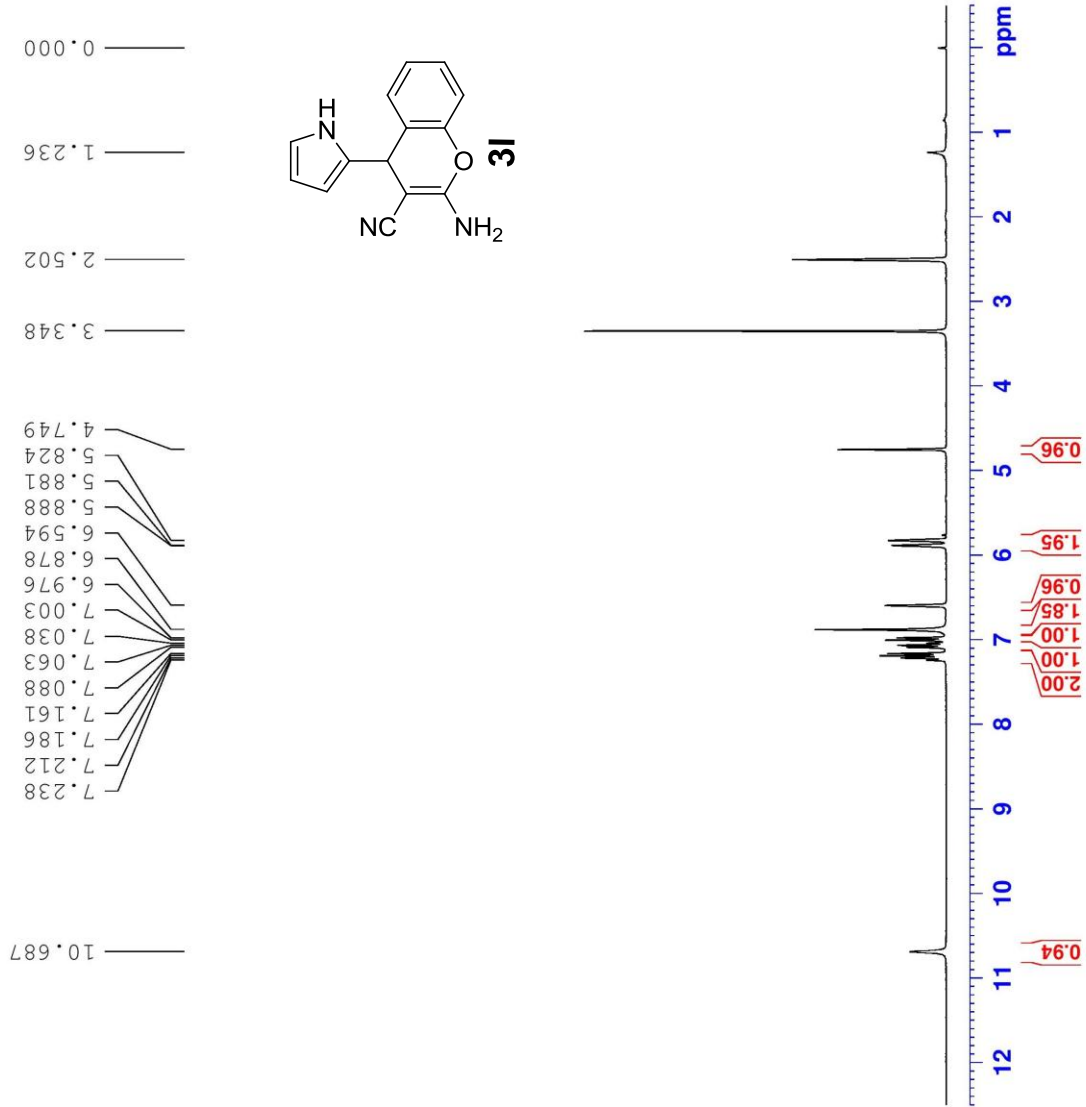

```

Current Data Parameters
NAME      0369H-2
EXPNO    1
PROCNO   1

F2 - Acquisition Parameters
Date_    20150714
Time     14.55
INSTRUM  spect
PROBHD   5 mm BBO BB-1H
PULPROG  zg30
TD       65536
SOLVENT  DMSO
NS       16
DS       2
SWH      6188.119 Hz
FIDRES   0.094423 Hz
AQ       5.2953587 sec
RG       322
DE       80.800 usec
TE       300.0 K
D1       1.00000000 sec
TD0      1

===== CHANNEL f1 =====
NUC1     1H
P1       9.00 usec
PL1      -2.00 dB
SFO1     300.1318534 MHz

F2 - Processing parameters
SI       32768
SF       300.1300000 MHz
WDW      EM
SSB      0
LB       0.30 Hz
GB       0
PC       1.00
  
```

```

Current Data Parameters
NAME      0805Q
EXPNO    1
PROCNO   1

F2 - Acquisition Parameters
Date_    20150704
Time     10.48
INSTRUM  spect
PROBHD   5 mm BBO BB-1H
PULPROG  zg30
TD       65536
SOLVENT  DMSO
NS       16
DS       2
SWH      6188.119 Hz
FIDRES   0.094423 Hz
AQ       5.2953587 sec
RG       256
DW       80.800 usec
DE       6.00 usec
TE       300.0 K
D1       1.0000000 sec
TD0      1

===== CHANNEL f1 =====
NUC1     1H
P1       8.60 usec
PL1     -2.00 dB
SFO1    300.1318534 MHz

F2 - Processing parameters
SI       32768
SF       300.1300010 MHz
WDW      EM
SSB      0
LB       0.30 Hz
GB       0
PC       1.00

```

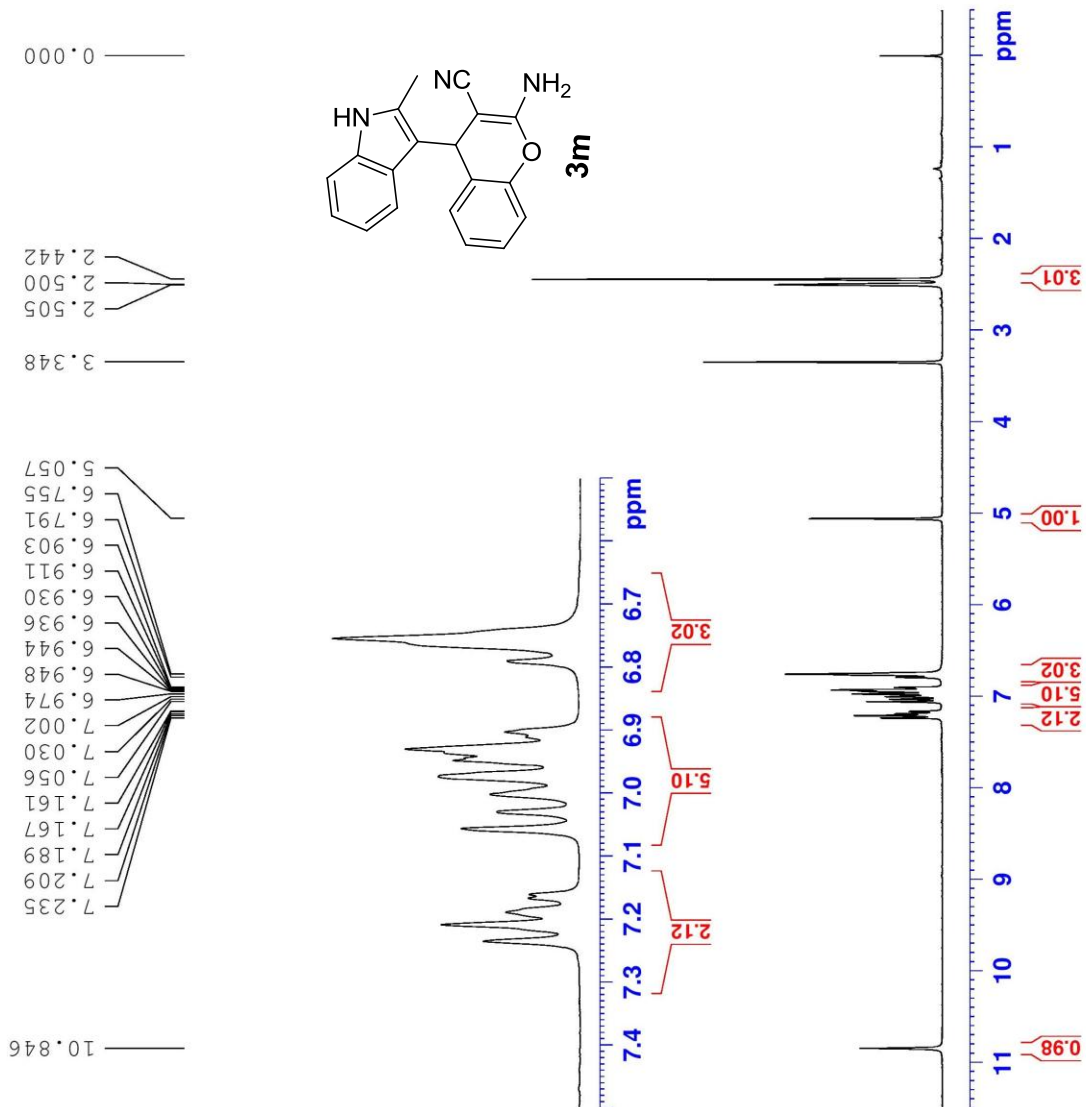

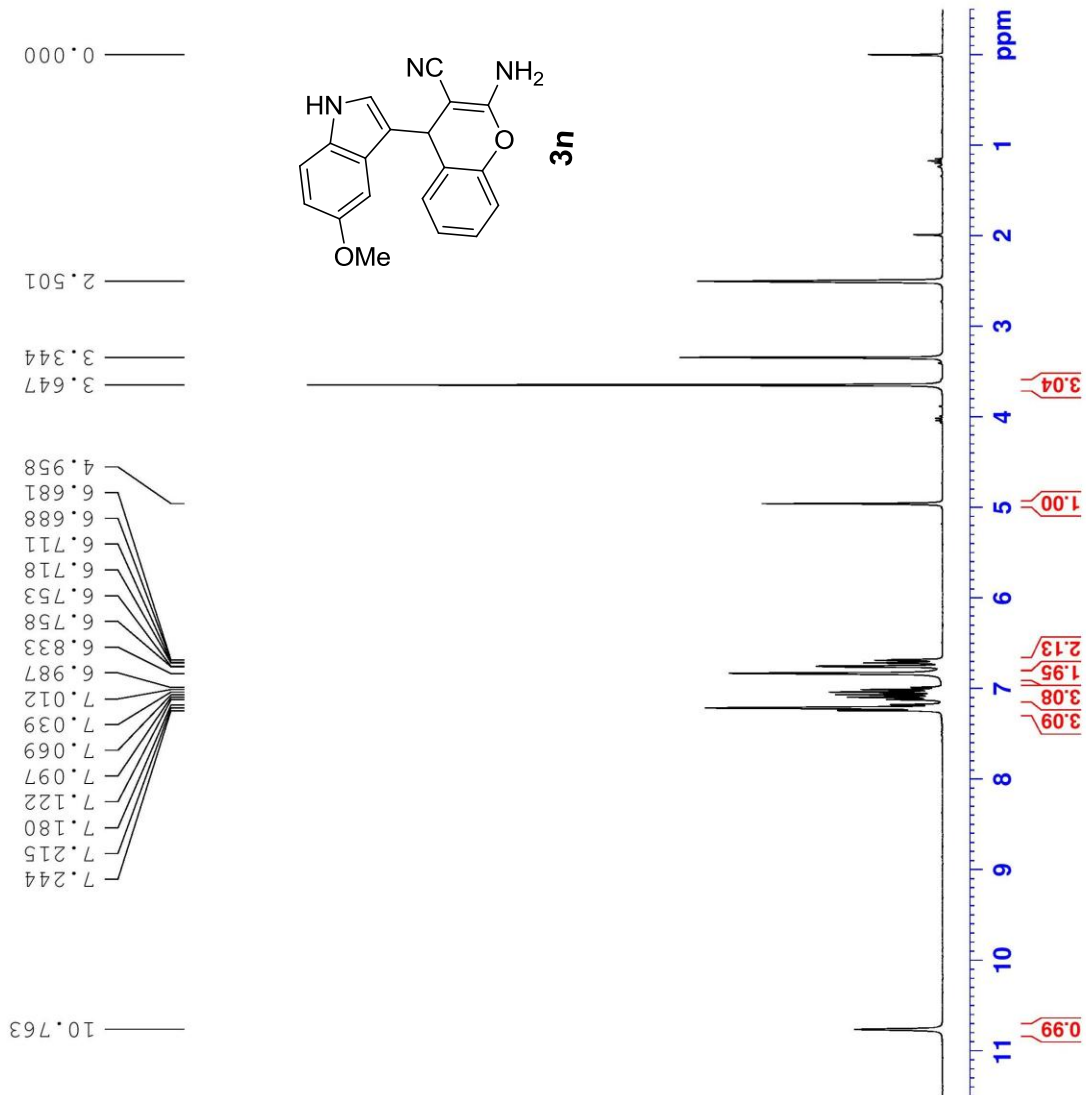

Current Data Parameters  
 NAME 0805P  
 EXPNO 1  
 PROCNO 1

F2 - Acquisition Parameters  
 Date\_ 20150704  
 Time 10.38  
 INSTRUM spect  
 PROBHD 5 mm BBO BB-1H  
 PULPROG zg30  
 TD 65536  
 SOLVENT DMSO  
 NS 16  
 DS 2  
 SWH 6188.119 Hz  
 FIDRES 0.094423 Hz  
 AQ 5.2953587 sec  
 RG 256  
 DW 80.800 usec  
 DE 6.00 usec  
 TE 300.0 K  
 D1 1.0000000 sec  
 TD0 1

===== CHANNEL f1 =====  
 NUC1 1H  
 P1 8.60 usec  
 PL1 -2.00 dB  
 SFO1 300.1318534 MHz

F2 - Processing parameters  
 SI 32768  
 SF 300.1300004 MHz  
 WDW EM  
 SSB 0  
 LB 0.30 Hz  
 GB 0  
 PC 1.00

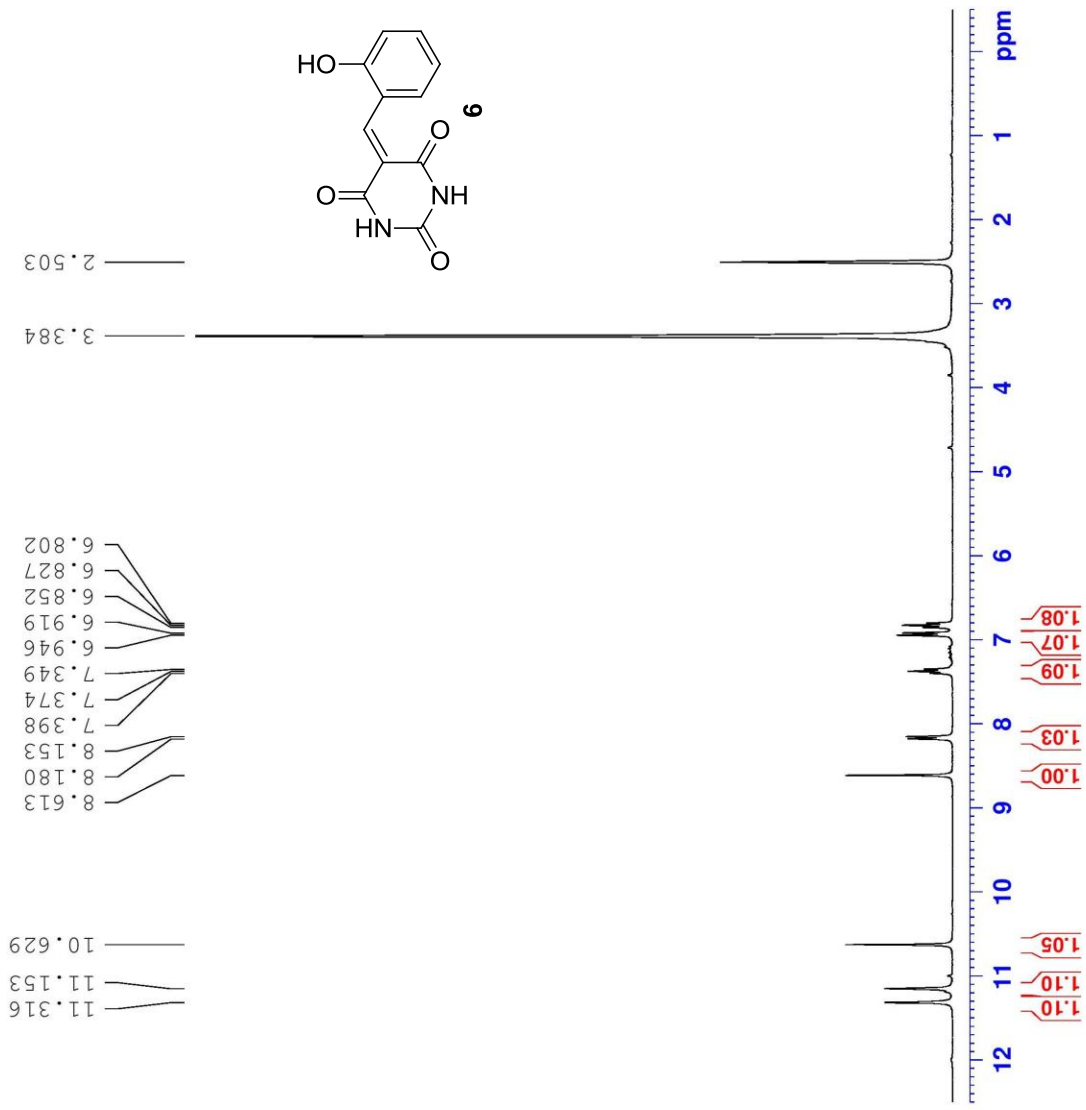

```

Current Data Parameters
NAME      1211D
EXPNO    1
PROCNO   1

F2 - Acquisition Parameters
Date_    20151226
Time     15.03
INSTRUM  spect
PROBHD   5 mm BBO BB-1H
PULPROG  zg30
TD       65536
SOLVENT  DMSO
NS       16
DS       2
SWH      6188.119 Hz
FIDRES   0.094423 Hz
AQ       5.2953587 sec
RG       228
DW       80.800 usec
DE       6.00 usec
TE       300.0 K
D1       1.0000000 sec
TD0      1

===== CHANNEL f1 =====
NUC1     1H
P1       9.00 usec
PL1      -2.00 dB
SFO1     300.1318534 MHz

F2 - Processing parameters
SI       32768
SF       300.1300000 MHz
WDW      EM
SSB      0
LB       0.30 Hz
GB       0
PC       1.00
  
```



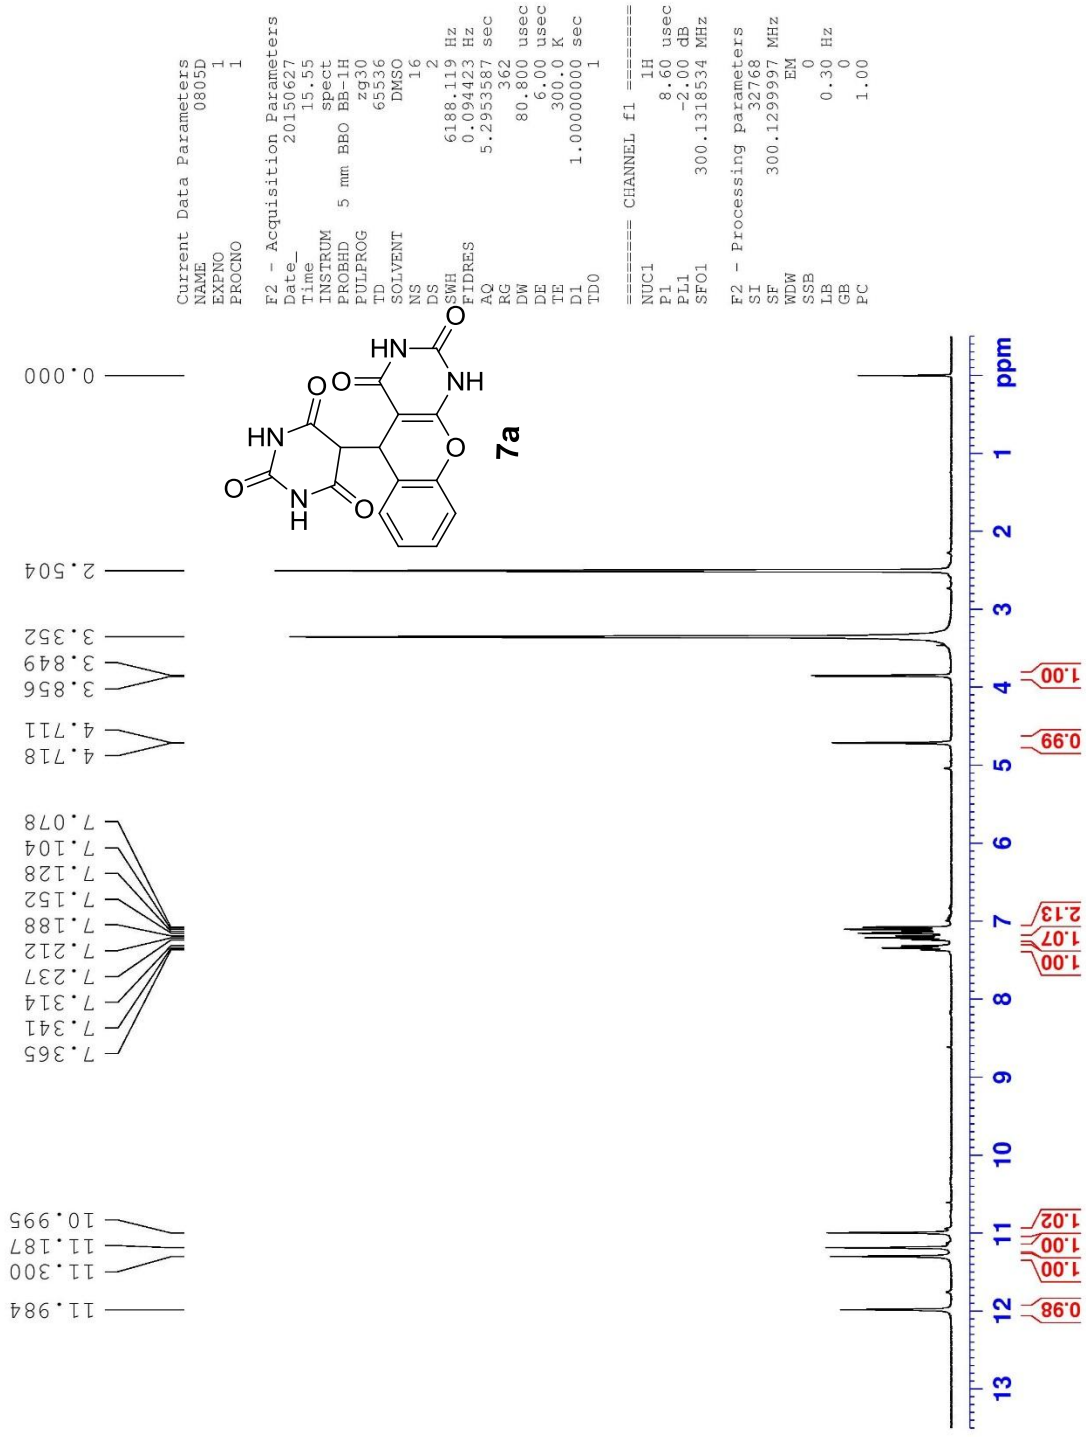

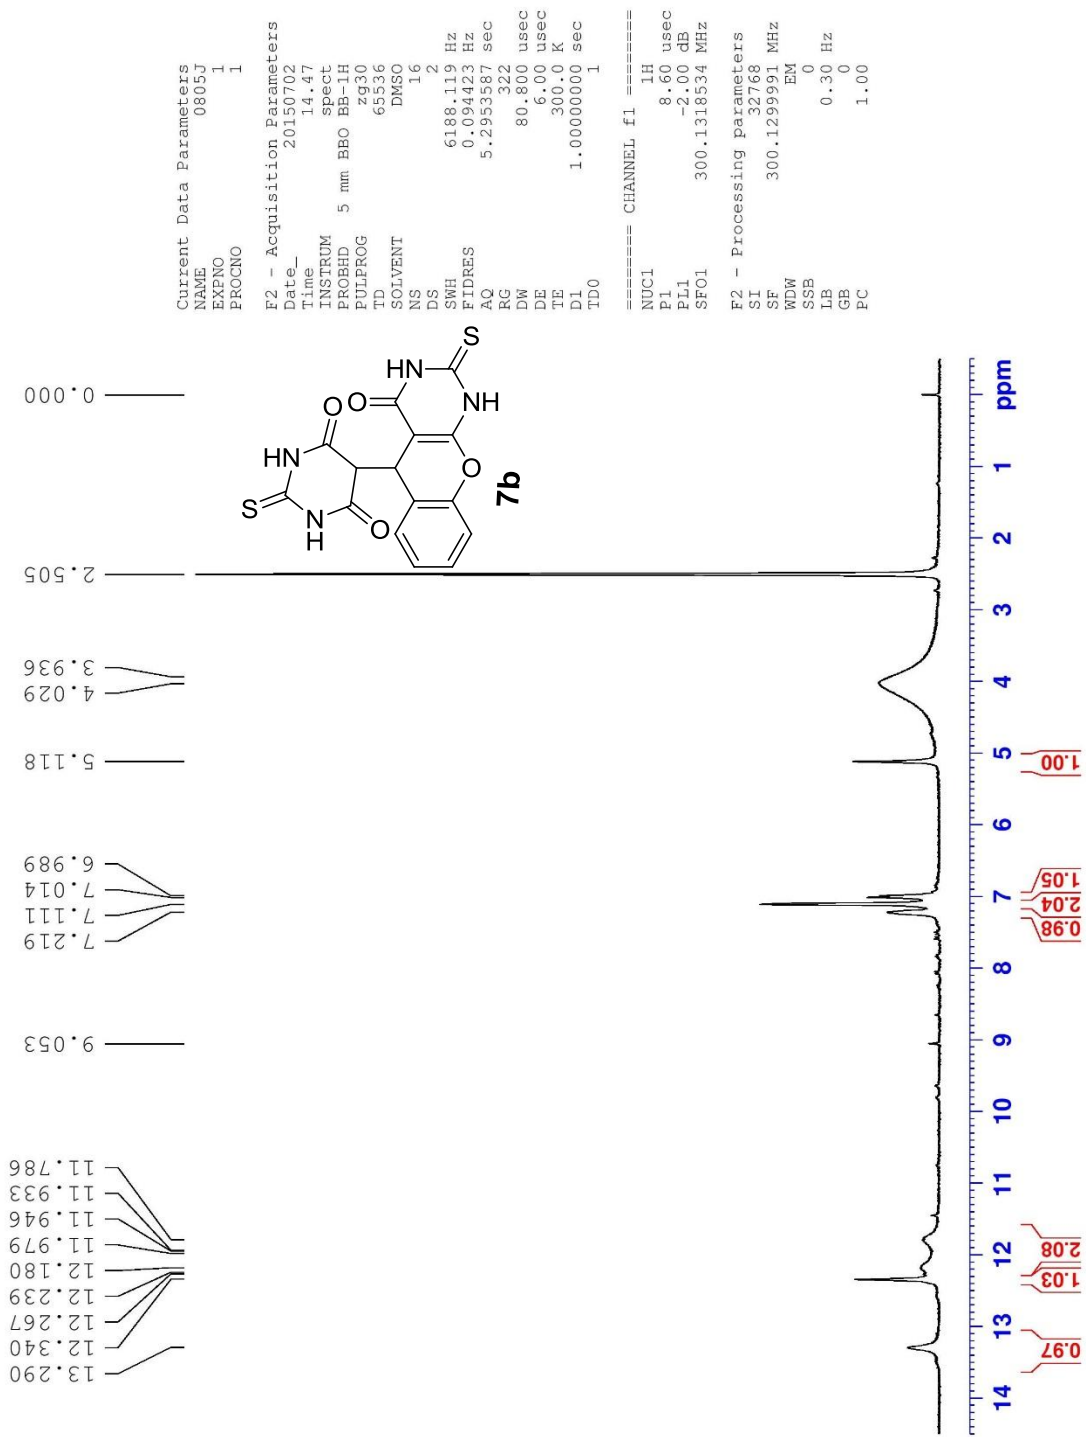

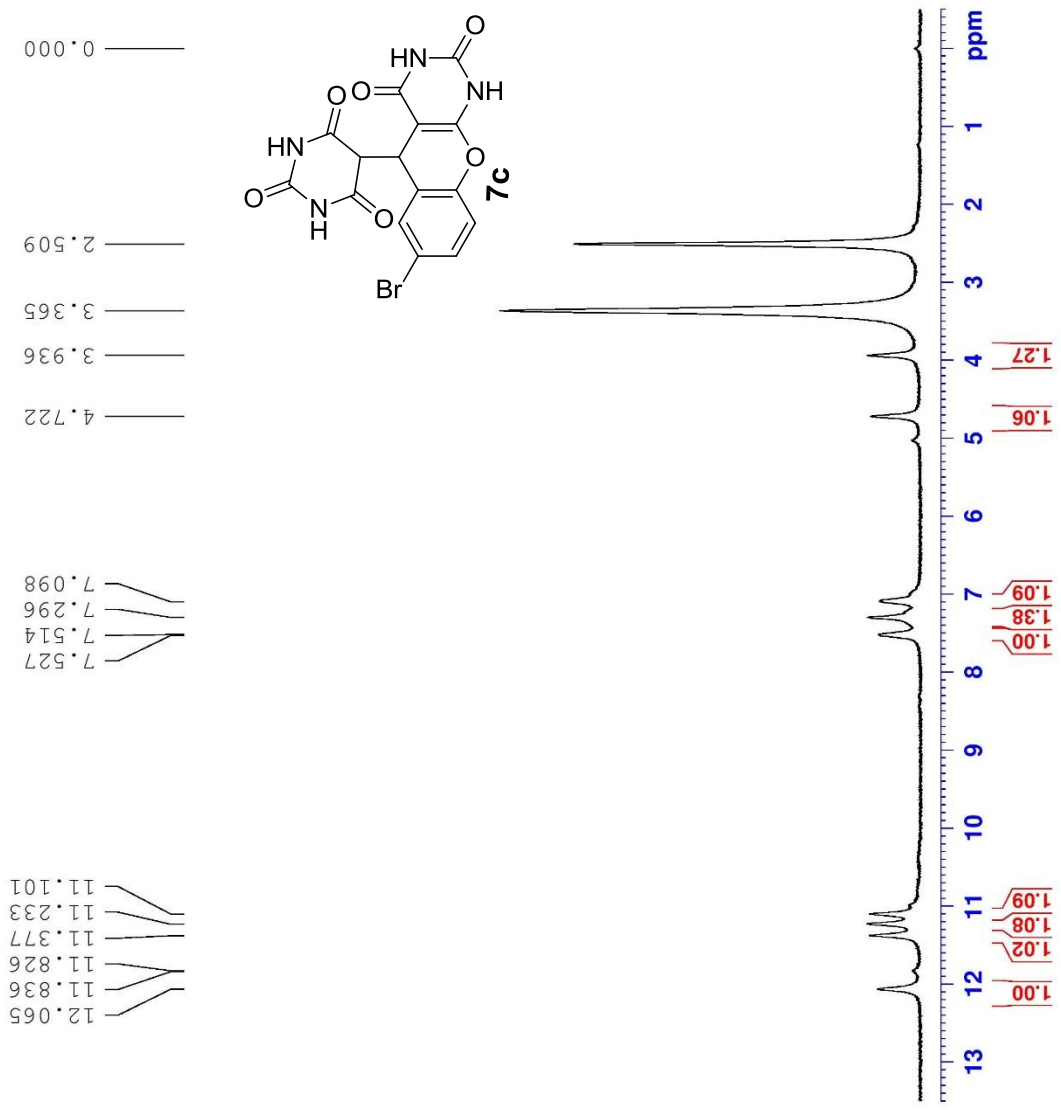

Current Data Parameters  
 NAME 0805H  
 EXPNO 1  
 PROCNO 1

F2 - Acquisition Parameters  
 Date\_ 20150702  
 Time 11.47  
 INSTRUM spect  
 PROBHD 5 mm BBO BB-1H  
 PULPROG zg30  
 TD 65536  
 SOLVENT DMSO  
 NS 16  
 DS 2  
 SWH 6188.119 Hz  
 FIDRES 0.094423 Hz  
 AQ 5.2953587 sec  
 RG 322  
 DW 80.800 usec  
 DE 6.00 usec  
 TE 300.0 K  
 D1 1.0000000 sec  
 TD0 1

===== CHANNEL f1 =====  
 NUC1 1H  
 P1 8.60 usec  
 PL1 -2.00 dB  
 SFO1 300.1318534 MHz

F2 - Processing parameters  
 SI 32768  
 SF 300.1299973 MHz  
 WDW EM  
 SSB 0  
 LB 0.30 Hz  
 GB 0  
 PC 1.00

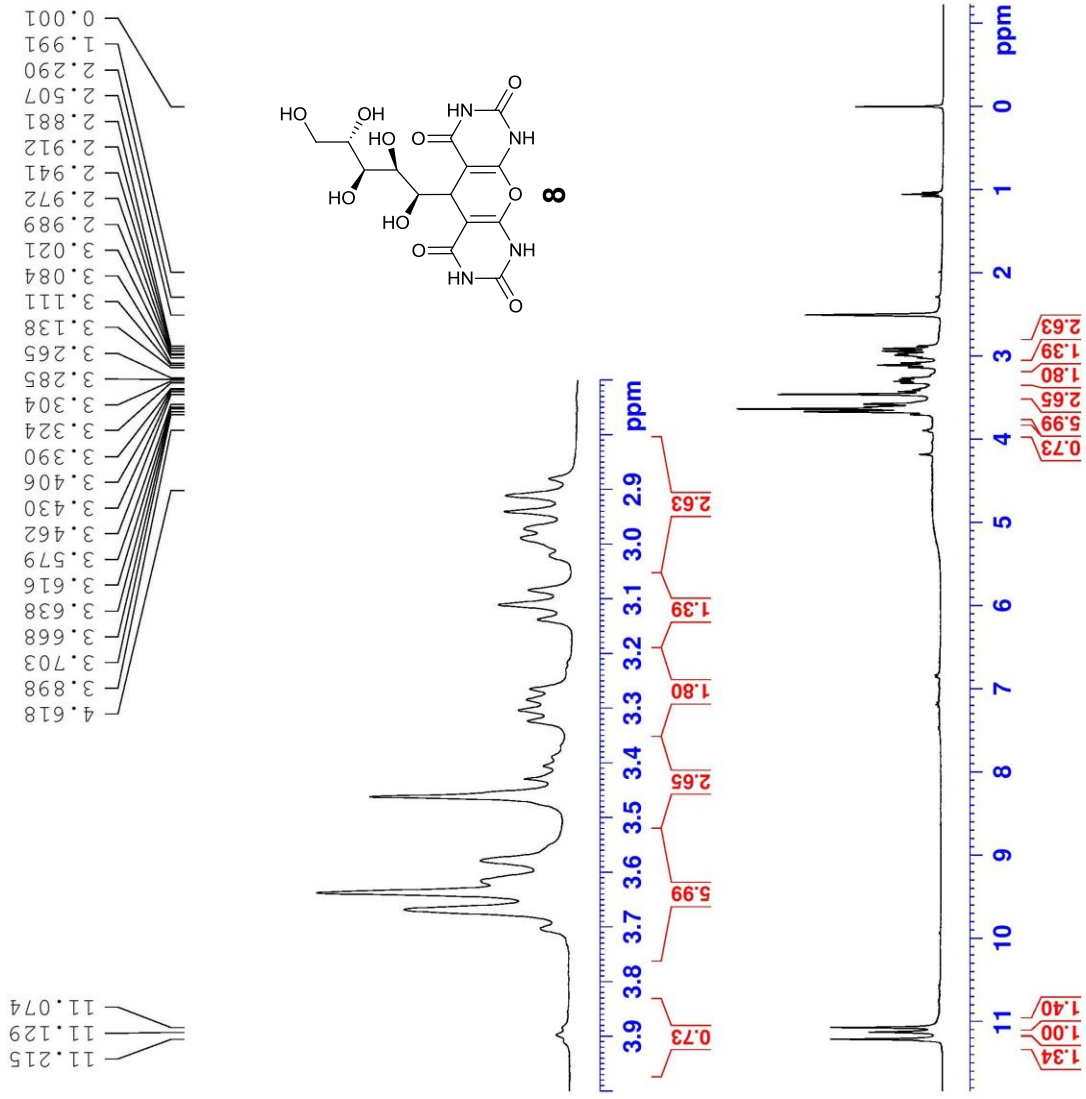

Current Data Parameters  
 NAME 0170F  
 EXPNO 1  
 PROCNO 1

F2 - Acquisition Parameters  
 Date\_ 20150226  
 Time 12.59  
 INSTRUM spect  
 PROBHD 5 mm BBO BB-1H  
 PULPROG zg30  
 TD 65536  
 SOLVENT DMSO  
 NS 16  
 DS 2  
 SWH 6188.119 Hz  
 FIDRES 0.094423 Hz  
 AQ 5.2953587 sec  
 RG 181  
 DW 80.800 usec  
 DE 6.00 usec  
 TE 300.0 K  
 D1 1.0000000 sec  
 TD0 1

===== CHANNEL f1 =====  
 NUC1 1H  
 P1 8.60 usec  
 PL1 -2.00 dB  
 SFO1 300.1318534 MHz

F2 - Processing parameters  
 SI 32768  
 SF 300.1299986 MHz  
 WDW EM  
 SSB 0  
 LB 0.30 Hz  
 GB 0  
 PC 1.00

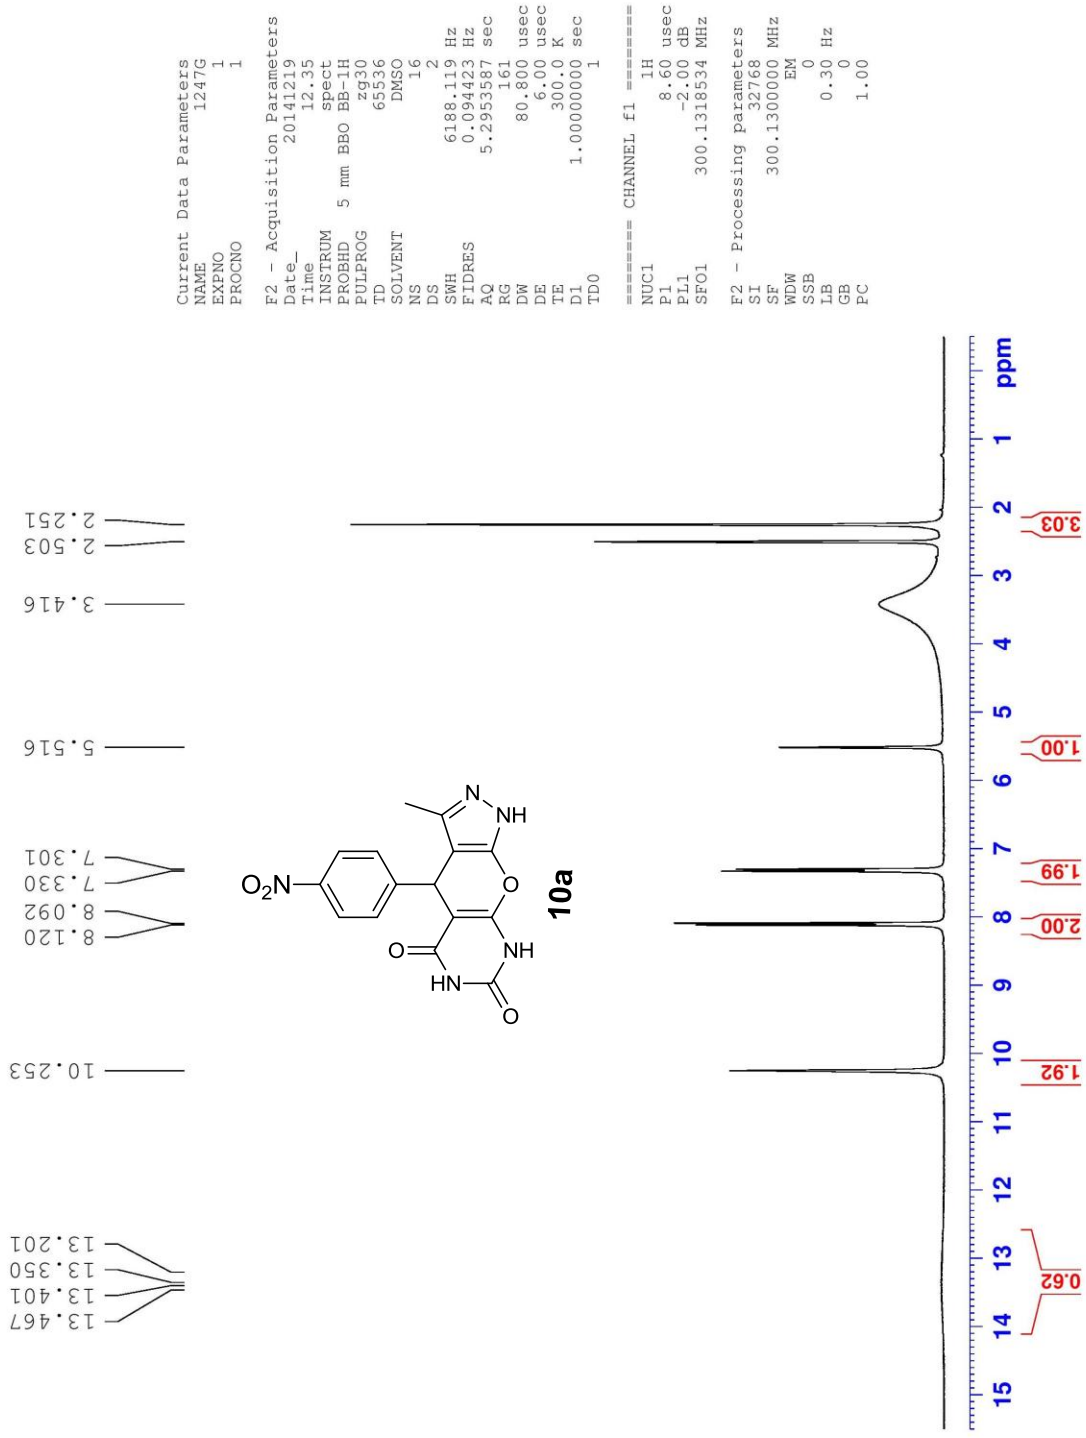

13.326  
 13.283  
 13.195  
 13.155  
 13.099  
 13.071  
 10.052  
 8.719  
 8.700  
 8.507  
 8.174  
 8.148  
 8.128  
 8.104  
 7.913  
 7.798  
 7.798  
 7.790  
 7.634  
 7.517  
 7.355  
 7.310  
 7.150  
 7.080  
 7.065  
 7.035  
 5.306  
 3.162  
 2.901  
 2.281  
 2.092  
 2.039  
 1.930  
 1.864  
 1.822  
 1.010

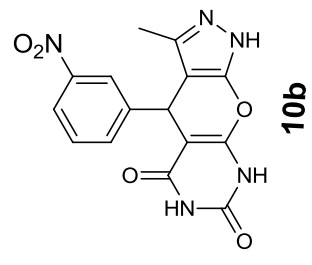

Current Data Parameters  
 NAME 12000  
 EXPNO 1  
 PROCNO 1  
 F2 - Acquisition Parameters  
 Date\_ 20141216  
 Time 15.20  
 INSTRUM spect  
 PROBHD 5 mm BBO BB-IH  
 PULPROG zg30  
 TD 65536  
 SOLVENT DMSO  
 NS 16  
 DS 2  
 SWH 6188.119 Hz  
 FIDRES 0.094423 Hz  
 AQ 5.2953587 sec  
 RG 161  
 DW 80.800 usec  
 DE 6.00 usec  
 TE 300.0 K  
 D1 1.00000000 sec  
 TD0 1  
 ===== CHANNEL f1 =====  
 NUC1 1H  
 P1 8.60 usec  
 PL1 -2.00 dB  
 SF01 300.1318534 MHz  
 F2 - Processing parameters  
 SI 32768  
 SF 300.1300664 MHz  
 WDW EM  
 SSB 0  
 LB 0.30 Hz  
 GB 0  
 PC 1.00

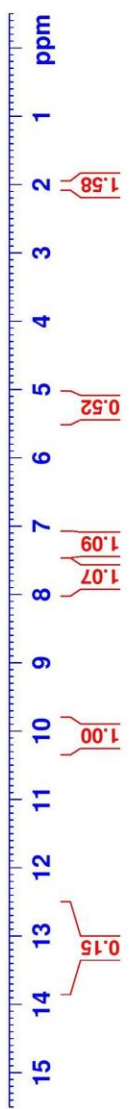

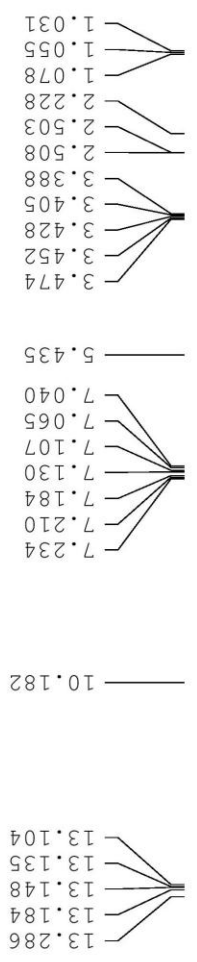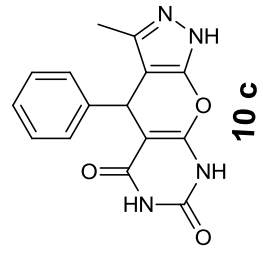

Current Data Parameters  
 NAME 1200N  
 EXPNO 1  
 PROCNO 1

F2 - Acquisition Parameters  
 Date\_ 20141215  
 Time 14.48  
 INSTRUM spect  
 PROHD 5 mm BBO BB-IH  
 PULPROG zg30  
 TD 65536  
 SOLVENT DMSO  
 NS 16  
 DS 2  
 SWH 6188.119 Hz  
 FIDRES 0.094423 Hz  
 AQ 5.2953587 sec  
 RG 203  
 DW 80.800 usec  
 DE 6.00 usec  
 TE 300.0 K  
 D1 1.00000000 sec  
 TD0 1

===== CHANNEL f1 =====  
 NUC1 1H  
 P1 8.60 usec  
 PL1 -2.00 dB  
 SF01 300.1318534 MHz

F2 - Processing parameters  
 SI 32768  
 SF 300.1300000 MHz  
 WDW EM  
 SSB 0  
 LB 0.30 Hz  
 GB 0  
 PC 1.00

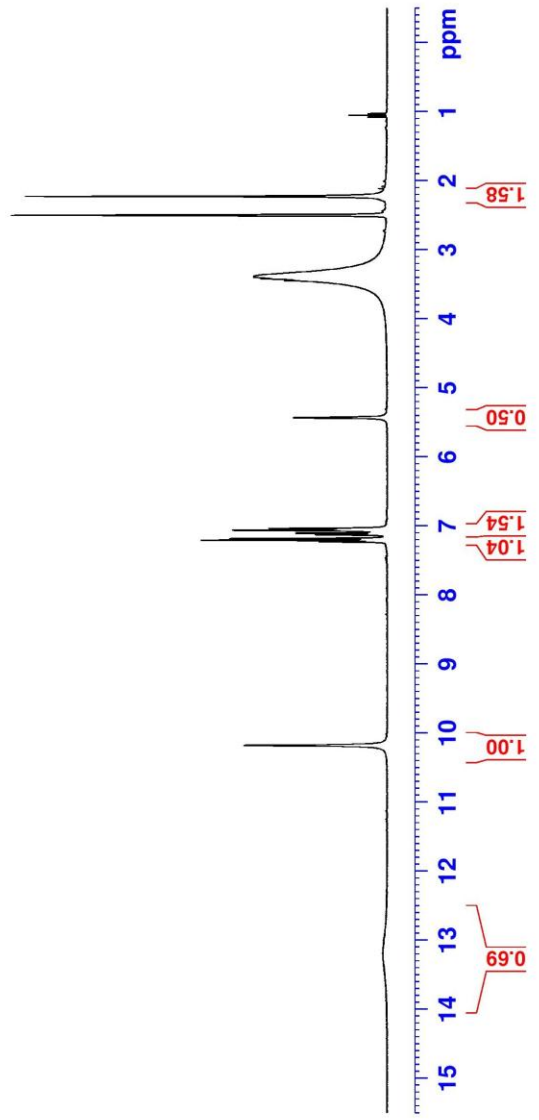

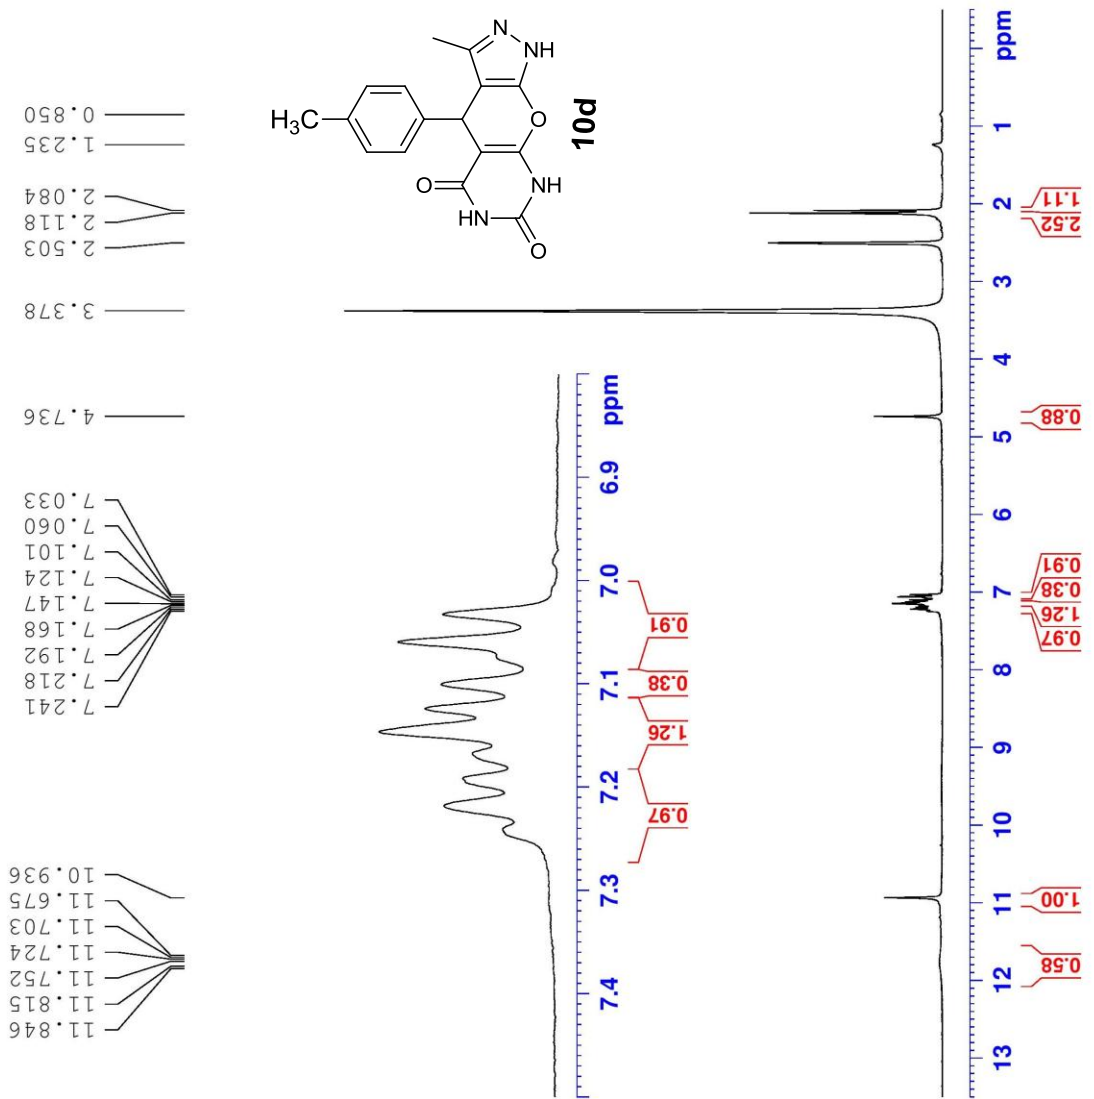

Current Data Parameters  
 NAME 12471  
 EXPNO 1  
 PROCNO 1

F2 - Acquisition Parameters  
 Date\_ 20141222  
 Time 14.18  
 INSTRUM spect  
 PROBHD 5 mm BBO BB-1H  
 PULPROG zg30  
 TD 65536  
 SOLVENT DMSO  
 NS 16  
 DS 2  
 SWH 6188.119 Hz  
 FIDRES 0.094423 Hz  
 AQ 5.2953587 sec  
 RG 181  
 DW 80.800 usec  
 DE 6.00 usec  
 TE 300.0 K  
 D1 1.00000000 sec  
 TD0 1

===== CHANNEL f1 =====  
 NUC1 1H  
 P1 8.60 usec  
 PL1 -2.00 dB  
 SF01 300.1318534 MHz

F2 - Processing parameters  
 SI 32768  
 WDW EM  
 SSB 0  
 LB 0  
 GB 0  
 PC 1.00



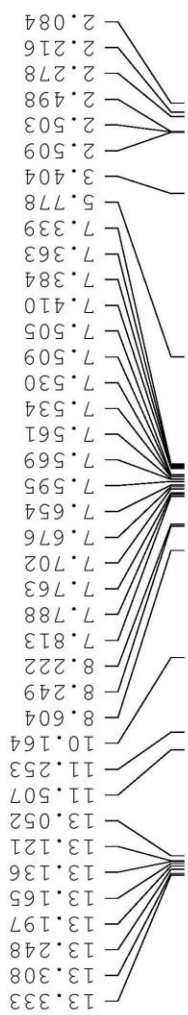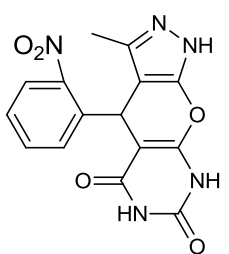

Current Data Parameters  
 NAME 0170B  
 EXPNO 1  
 PROCNO 1

F2 - Acquisition Parameters  
 Date\_ 20150217  
 Time 10.50  
 INSTRUM spect  
 PROBHD 5 mm BBO BB-1H  
 PULPROG zg30  
 TD 65536  
 SOLVENT DMSO  
 NS 16  
 DS 2  
 SWH 6188.119 Hz  
 FIDRES 0.094423 Hz  
 AQ 5.2953587 sec  
 RG 203  
 DW 80.800 usec  
 DE 6.00 usec  
 TE 300.0 K  
 D1 1.00000000 sec  
 TD0 1

===== CHANNEL f1 =====  
 NUC1 1H  
 P1 8.60 usec  
 PL1 -2.00 dB  
 SFO1 300.1318534 MHz

F2 - Processing parameters  
 SI 32768  
 SF 300.1300000 MHz  
 WDW EM  
 SSB 0  
 LB 0.30 Hz  
 GB 0  
 PC 1.00

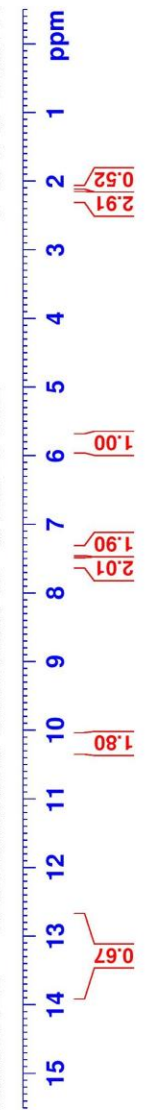

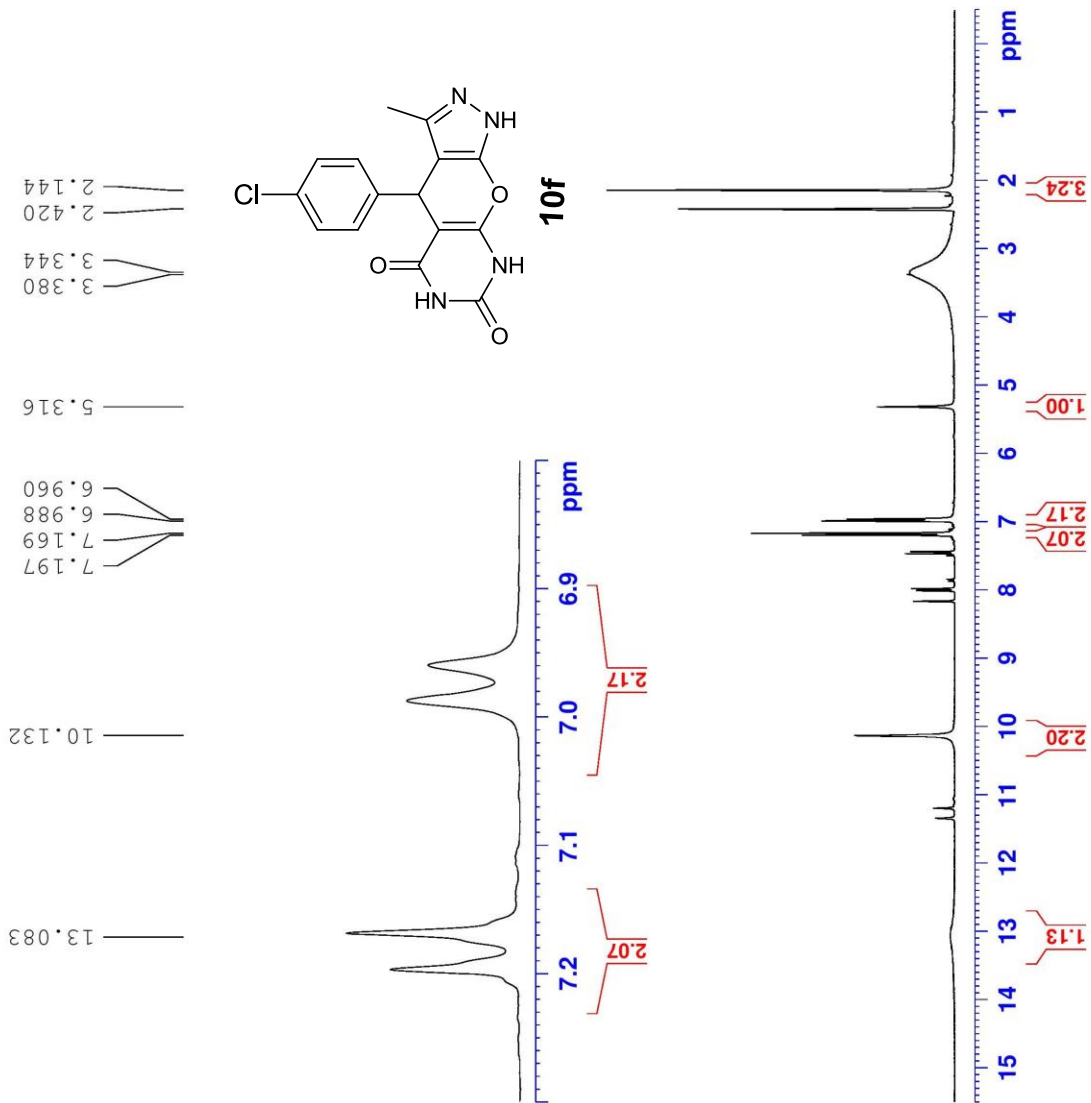

Current Data Parameters  
 NAME 1247D  
 EXPNO 1  
 PROCNO 1

F2 - Acquisition Parameters  
 Date\_ 20141217  
 Time 15.46  
 INSTRUM spect  
 PROBHD 5 mm BBO BB-1H  
 PULPROG zg30  
 TD 65536  
 SOLVENT DMSO  
 NS 16  
 DS 2  
 SWH 6188.119 Hz  
 FIDRES 0.094423 Hz  
 AQ 5.2953587 sec  
 RG 181  
 DE 80.800 usec  
 TE 300.0 K  
 D1 1.0000000 sec  
 TD0 1

===== CHANNEL f1 =====  
 NUC1 1H  
 P1 8.60 usec  
 PL1 -2.00 dB  
 SFO1 300.1318534 MHz

F2 - Processing parameters  
 SI 32768  
 SF 300.1300248 MHz  
 WDW EM  
 SSB 0  
 LB 0.30 Hz  
 GB 0  
 PC 1.00

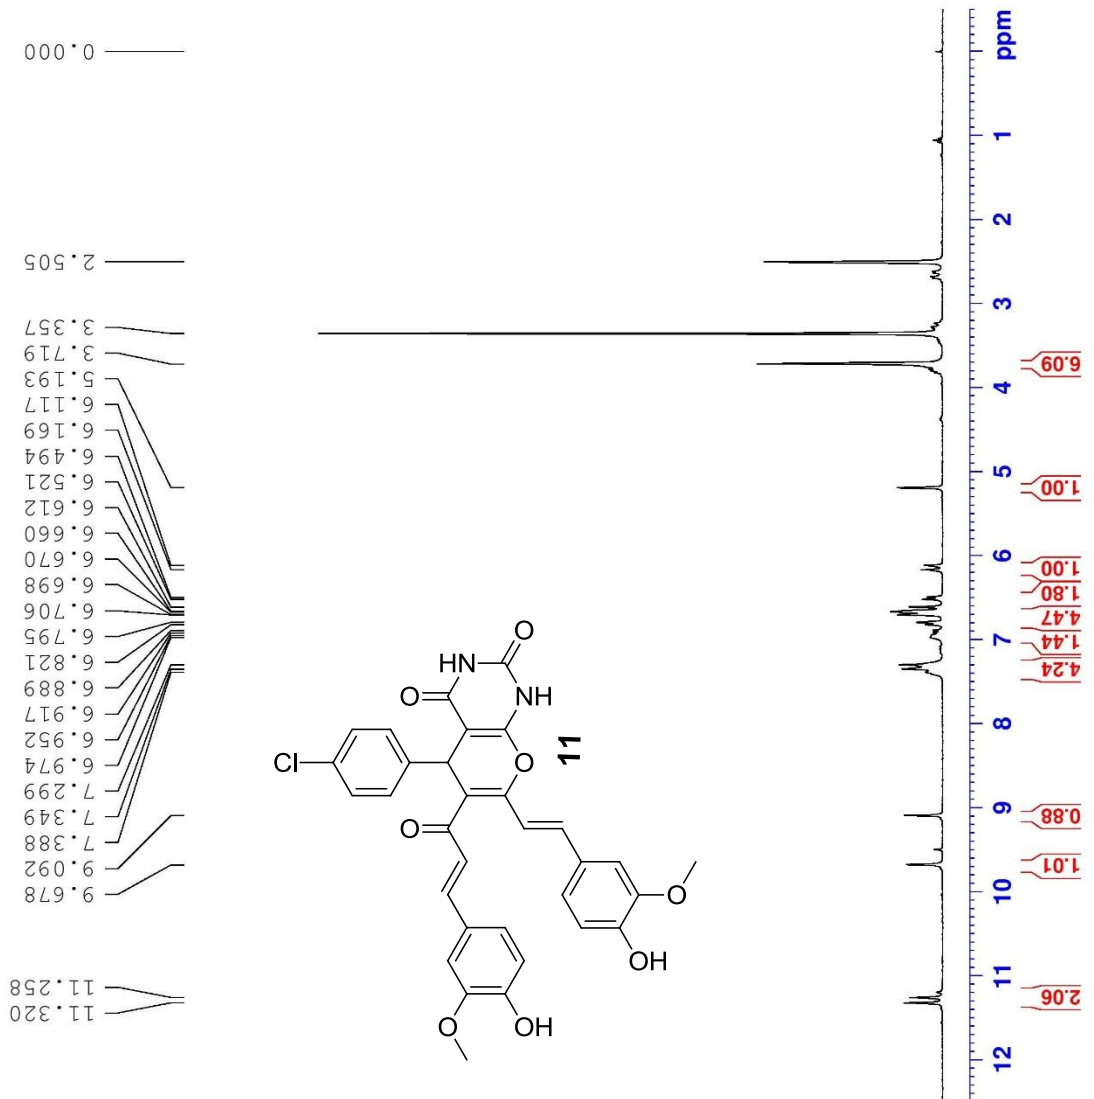

Current Data Parameters  
NAME 0805E  
EXPNO 1  
PROCNO 1

F2 - Acquisition Parameters  
Date\_ 20150701  
Time 14.52  
INSTRUM spect  
PROBHD 5 mm BBO BB-1H  
PULPROG zg30  
TD 65536  
SOLVENT DMSO  
NS 16  
DS 2  
SWH 6188.119 Hz  
FIDRES 0.094423 Hz  
AQ 5.2953587 sec  
RG 256  
DE 80.800 usec  
TE 6.00 usec  
D1 300.0 K  
D1 1.00000000 sec  
TD0 1

==== CHANNEL f1 =====  
NUC1 1H  
P1 8.60 usec  
PL1 -2.00 dB  
SF01 300.1318534 MHz

F2 - Processing parameters  
SI 32768  
SF 300.1299994 MHz  
WDW EM  
SSB 0  
LB 0.30 Hz  
GB 0  
PC 1.00
